1 Cassidy S. Cornblatt, Han-Wei Shih<sup>#</sup>, Gabriele B. Monshausen<sup>\*</sup>

2

3 Department of Biology, Pennsylvania State University, 208 Mueller Lab, University Park, Pa

4 16802

5

6 <sup>#</sup>Present address: Department of Biology, University of Washington, Life Science Building, Box

7 351800, Seattle, WA 98195

8

9 <sup>\*</sup>Corresponding author: [gmonshausen@psu.edu](mailto:gmonshausen@psu.edu)

10

11

12 Title: Stimulus-specific processing of the plasma membrane receptor-like kinase FERONIA in

13 *Arabidopsis thaliana*

14

15 Short title: Stimulus-specific processing of FERONIA

16

17

18 The author(s) responsible for distribution of materials integral to the findings presented in this

19 article in accordance with the policy described in the Instructions for Authors

20 ([www.plantcell.org](http://www.plantcell.org)) is (are): Gabriele B. Monshausen ([gmonshausen@psu.edu](mailto:gmonshausen@psu.edu)).

21

22

23 ABSTRACT

24 FERONIA (FER), a receptor-like kinase involved in plant immunity, cell expansion, and  
25 mechanical signal transduction, is known to be endocytosed and degraded in response to  
26 treatment with its peptide ligand RAPID ALKALINIZATION FACTOR 1 (RALF1). Using  
27 confocal fluorescence microscopy and biochemical assays, we have found that full length FER-  
28 eGFP abundance at the plasma membrane is also regulated by mechanical stimulation, but  
29 through a separate, cysteine protease-dependent pathway. Like RALF1 treatment, both  
30 mechanical bending and mechanical wounding trigger a reduction in plasma membrane-  
31 localized, native promoter-driven FER-eGFP in Arabidopsis roots, hypocotyls, and cotyledons.  
32 However, pharmacological inhibition of protein trafficking and degradation suggests that while  
33 RALF1 induces clathrin-mediated endocytosis and subsequent degradation of FER-eGFP,  
34 mechanical stimulation triggers cleavage and/or degradation of FER-eGFP in a cysteine  
35 protease-dependent, clathrin-independent manner. Despite the stimulus-dependent differences in  
36 these two pathways, we found that both require early FER signaling components, including  $\text{Ca}^{2+}$   
37 signaling, FER kinase activity, and the presence of LLG1, a FER-interacting protein with an  
38 essential role in FER-dependent signal transduction.

39

40

## 41 INTRODUCTION

42 Receptor-like kinases (RLKs) play a central role in enabling plants to sense and respond to their  
43 biotic and abiotic environment. Multiple members of this superfamily bind to extracellular  
44 ligands, whereupon they initiate signal transduction cascades culminating in transcriptional and  
45 post-translational responses (Yin et al., 2019). In order to appropriately tune the duration and  
46 intensity of such responses, control mechanisms need to be in place to modulate RLK-mediated  
47 signaling. In animal systems, termination or reversible off-switching of receptor signaling can  
48 occur via receptor (de)phosphorylation, decreasing the availability of or affinity for the receptor  
49 ligand, proteolytic cleavage, and ubiquitination and endocytosis of receptors for recycling or  
50 eventual degradation (Ledda and Paratcha, 2007; Lemmon et al., 2016; Kliewer et al., 2017;  
51 Fernandes et al., 2019).

52

53 In Arabidopsis, plasma membrane levels of RLKs involved in defense signaling, including  
54 FLAGELLIN-SENSITIVE 2 (FLS2), PEP RECEPTOR 1/2 (PEPR1/2), EF-TU RECEPTOR  
55 (EFR), and LYSIN MOTIF-CONTAINING RECEPTOR-LIKE KINASE 5 (LYK5), have been  
56 shown to be controlled via ligand-induced endocytosis (Robatzek et al., 2006; Zipfel et al., 2006;  
57 Krol et al., 2010; Mbengue et al., 2016; Erwig et al., 2017). While many details about the  
58 mechanisms underlying activation and subsequent internalization of specific pattern recognition  
59 RLKs remain to be characterized, some common themes are emerging. The receptors  
60 heteromerize with co-receptors such as BRI1-ASSOCIATED RECEPTOR KINASE 1  
61 (BAK1)/SOMATIC EMBRYOGENESIS RECEPTOR KINASE (SERK) family members or  
62 CHITIN ELICITOR RECEPTOR KINASE 1 (CERK1) upon binding their respective ligands  
63 (Wan et al., 2019), activation involves a phosphorylation step (Salamon and Robatzek, 2006;  
64 Macho et al., 2014; Ben Khaled, 2016; Erwig et al., 2017), and receptors appear to undergo  
65 ubiquitination before being endocytosed (Lu et al., 2011; Li et al., 2014a; Liao et al., 2017).  
66 Whether BAK1 and CERK1 co-receptors are internalized and degraded along with the associated  
67 pattern recognition RLKs is currently not known.

68

69 There is, however, intriguing evidence that BAK1 and CERK1 can be proteolytically processed  
70 directly at the plasma membrane (Petutschnig et al., 2014; Zhou et al., 2019). The proteolytic  
71 cleavage appears to be related to the RLKs' role in cell death control, which is distinct from their

72 role in immune responses (Schwessinger et al., 2011; Petutschnig et al., 2014; Zhou et al., 2019).  
73 This suggests that RLKs may be differentially processed for degradation in different signaling  
74 contexts. In animals, the receptor tyrosine kinase MET is a prototype for such diverging receptor  
75 processing pathways. Upon binding its ligand, the hepatocyte growth factor HGF, MET induces  
76 cell survival responses and undergoes endocytosis and lysosomal degradation. In the absence of  
77 its ligand, MET can be subjected to presenilin-regulated intramembrane proteolysis for removal  
78 under steady-state conditions, cleavage by caspases to enhance apoptotic signaling, or  
79 inactivation via calpain-mediated cleavage during necrosis (Fernandes et al., 2019).

80

81 In plants, FERONIA (FER), a member of the malectin-like-domain CrRLK1L subfamily, is  
82 involved in a wide range of growth, developmental, and stress response processes including cell  
83 expansion (Duan et al., 2010; Shih et al., 2014; Bastien et al., 2016), pollen reception (Huck et  
84 al., 2003; Rotman et al., 2003; Escobar-Restrepo et al., 2007), hormone responses (Deslauriers  
85 and Larsen, 2010; Yu et al., 2012; Höfte, 2015; Chen et al., 2016; Guo et al., 2018; Dong et al.,  
86 2019), defense signaling (Guo et al., 2018), salt stress responses (Yu and Assmann, 2018; Zhao  
87 et al., 2018), cell wall integrity maintenance (Feng et al., 2018; Dünser et al., 2019; Herger et al.,  
88 2019), and mechanical signaling (Shih et al., 2014). FERONIA has been proposed to serve as a  
89 scaffold to assemble immune receptors (Stegmann et al., 2017), but it is also known to function  
90 as a receptor for secreted cysteine-rich signaling peptides of the RAPID ALKALINIZATION  
91 FACTOR (RALF) family (Haruta et al., 2014; Zhao et al., 2018; Xiao et al., 2019; Gjetting et al.,  
92 2020; Yu et al., 2020). Binding of the RALF23 peptide appears to promote the heteromerization  
93 of FER with LORELEI-LIKE GLYCOSYLPHOSPHATIDYLINOSITOL-ANCHORED 1 and 2  
94 (LLG1/2) *in vitro* (Xiao et al., 2019), and *in vivo*, LLG1 and LORELEI proteins are required to  
95 mediate FER-regulated signaling processes (Li et al., 2015; Galindo-Trigo et al., 2020).

96

97 Given its key role in integrating myriad physiological processes, the abundance of FER at the  
98 plasma membrane is likely to be tightly controlled. FERONIA was recently shown to be  
99 internalized in response to treatment with its RALF ligand (Zhao et al., 2018; Yu et al., 2020)  
100 and to also undergo endocytosis under steady state conditions (Yu et al., 2020). Here we present  
101 evidence that FER is processed via distinct degradation pathways in different signaling contexts.  
102 We confirm that RALF1 triggers clathrin-mediated endocytosis and degradation of FER along



103 the well-established endosomal trafficking pathway. In contrast, mechanical stimulation by  
104 bending or wounding induces FER degradation via a cysteine protease-dependent process, which  
105 does not appear to involve FER internalization. While these divergent, stimulus-specific cellular  
106 fates of FER may reflect different functions of the receptor, both require operational FER signal  
107 transduction components.

108

109

## 110 RESULTS

### 111 **Fungal RALF and mechanical stimulation elicit reduction of plasma membrane-localized** 112 **FER-eGFP fluorescence similar to RALF1 treatment**

113 Given the recent evidence that exogenous RAFL1, RALFL22, and RALF23 induce FER  
114 internalization (Zhao et al., 2018; Yu et al., 2020), we first wanted to confirm that FER plasma  
115 membrane (PM) abundance is also modulated by binding its RALF1 ligand under our  
116 experimental conditions. To this end, we used confocal microscopy to visualize PM FER-eGFP  
117 fluorescence in roots, hypocotyls, and cotyledons of 4- to 5-d-old transgenic *fer-4* mutants  
118 transformed with *FERpro:FER-eGFP*, a construct that fully complements *fer* null mutants (Shih  
119 et al., 2014). Fluorescence was quantified in ImageJ by outlining the PMs of three representative  
120 cells in each image and averaging their fluorescence intensities (Supplemental Figure S1). Since  
121 PM fluorescence intensity was variable in *FERpro:FER-eGFP/fer-4* seedlings, we calculated  
122 ratios (fluorescence<sub>after treatment</sub>/fluorescence<sub>before treatment</sub>) to normalize values. We found that  
123 RALF1 triggered a significant reduction in PM FER-eGFP fluorescence within 1 h of treatment  
124 in root and cotyledon epidermal cells (Figure 1). No equivalent loss of fluorescence was  
125 observed in control experiments, showing that reduction in fluorescence intensity was not due to  
126 photobleaching or mixing of growth medium (Figure 1, A, C-F). Together, these results confirm  
127 that RALF1 triggers FER internalization.

128  
129 What leads to increased release of endogenous RALF peptides to decrease FER PM abundance  
130 in plants is largely unknown; however, plants may be exposed to exogenous RALF when they  
131 encounter plant parasites or pathogens, some of which have been shown to secrete RALF peptide  
132 homologues during plant infection (Masachis et al., 2016; Thynne et al., 2017; Zhang et al.,  
133 2020). Indeed, FER-dependent RALF signaling appears to have been hijacked by some strains of  
134 the fungus *Fusarium oxysporum*, which may release F(*usarium*)-RALF to increase their  
135 virulence (Masachis et al., 2016; Thynne et al., 2017). To test whether F-RALF also triggers a  
136 decrease in FER-eGFP PM levels, we treated Arabidopsis roots and cotyledons with a synthetic  
137 RALF corresponding to the F-RALF produced by *F. oxysporum* f. sp. *lycopersici* 4287 (Thynne  
138 et al., 2017). We first confirmed that Arabidopsis roots produced a strong Ca<sup>2+</sup> response to F-  
139 RALF similar to that observed after RALF1 treatment but with a more transient peak and a slight

140 shoulder (Supplemental Figure S2). This difference in calcium signature is unsurprising since the  
141 kinetics of the  $\text{Ca}^{2+}$  responses to different Arabidopsis RALFLs are quite variable (Gjetting et al.,  
142 2020). We then examined the effect of F-RALF on FER-eGFP localization and found that F-  
143 RALF triggered a decrease in root and cotyledon epidermal cell PM FER-eGFP levels similar to  
144 RALF1 within 1 h of treatment (Figure 1, C and E). Fungal RALF thus appears to coopt not only  
145 FER-dependent ion signaling pathways but can also modulate the abundance of FER at the PM.  
146

147 In addition to operating as a RALF peptide receptor, FER also serves a key role in cell wall  
148 integrity maintenance (Duan et al., 2010; Feng et al., 2018), although it is not yet clear if and  
149 how these functions are linked. As we have previously shown that FER is essential for normal  
150 mechanical signal transduction (Shih et al., 2014), we decided to analyze the effect of  
151 mechanical stimulation on FER-eGFP PM levels. Two types of mechanical stimulation were  
152 performed – (i) organ bending of roots and hypocotyls and (ii) mechanical wounding by  
153 detaching a cotyledon – and both types were found to elicit a decrease in PM FER-eGFP  
154 fluorescence (Figure 1, A, C-F; Supplemental Figure S3). Interestingly, the response to  
155 cotyledon wounding occurred throughout the seedling, including in both the detached and the  
156 still attached cotyledon as well as in the hypocotyl and the root elongation zone (Figure 1F).

157  
158 Importantly, loss of FER-eGFP fluorescence in response to RALF1 treatment and mechanical  
159 stimulation does not appear to be part of an unspecific alteration of all PM protein levels as  
160 neither the plasma membrane marker eGFP-RCI2B/LTI6B (Cutler et al., 2000) nor FLS2-eGFP  
161 exhibited a reduction in fluorescence intensity under these conditions (Figure 1, B, C-E, and 2).  
162 Conversely, when we treated plants expressing FLS2-eGFP or FER-eGFP with the FLS2 ligand  
163 flg22, FLS2-eGFP PM fluorescence decreased as expected (Robatzek et al., 2006) while FER-  
164 eGFP fluorescence remained stable (Figure 2; see also Zhao et al., 2018). These results  
165 demonstrate the specificity of the RALF1- and mechanically-induced PM FER-eGFP reduction.

166  
167 Plasma membrane levels of FER-eGFP have previously been shown to be reduced by severe salt  
168 stress (Zhao et al., 2018). While we were able to confirm these results, we also observed a  
169 pronounced loss of eGFP-RCI2B fluorescence in seedlings treated with 150 mM NaCl  
170 (Supplemental Figure S4), indicating that the salt response is not specific to FER.

171

172 **Regulation of FER-eGFP PM abundance is dependent on Ca<sup>2+</sup> signaling and requires an**  
173 **active FER kinase domain**

174 Though it has previously been shown that FER undergoes internalization in response to RALF  
175 exposure, little is known about how the process is regulated. Since both RALF1 and mechanical  
176 perturbation trigger rapid, FER-dependent increases in cytosolic Ca<sup>2+</sup> concentration ([Ca<sup>2+</sup>]<sub>cyt</sub>) in  
177 both Arabidopsis seedling roots and shoots (Haruta et al., 2008; Shih et al., 2014), and  
178 mechanical wounding is known to elicit a propagating wave of [Ca<sup>2+</sup>]<sub>cyt</sub> throughout the plant  
179 (Toyota et al., 2018), we hypothesized that Ca<sup>2+</sup> signaling functions upstream of stimulus-  
180 induced FER-eGFP removal from the PM. Previous aequorin-based measurements of RALF1-  
181 treated seedlings have not yet resolved which organs or tissues contribute to the Ca<sup>2+</sup> response in  
182 shoots (Haruta et al., 2008), so we first monitored Arabidopsis expressing the genetically  
183 encoded Ca<sup>2+</sup> sensor Yellow Cameleon 3.6 (Nagai et al., 2004) and confirmed that cotyledons  
184 indeed exhibit [Ca<sup>2+</sup>]<sub>cyt</sub> elevation upon RALF1 exposure (Supplemental Figure S2B).  
185 Pretreatment with 300 μM of the Ca<sup>2+</sup> channel blocker La<sup>3+</sup> (Monshausen et al., 2009) abolished  
186 the RALF1- and mechanically-induced reduction of PM FER-eGFP fluorescence (Figure 3),  
187 indicating that this loss of PM FER-eGFP is dependent on Ca<sup>2+</sup> signaling.

188

189 FERONIA kinase activity is known to be involved in FER-dependent RALF1 and mechanical  
190 signaling but is not absolutely required for generation of Ca<sup>2+</sup> and pH responses (Shih et al.,  
191 2014; Haruta et al., 2018) or Arabidopsis shoot development and stomatal movements  
192 (Chakravorty et al., 2018). We analyzed a *fer* null mutant expressing a kinase inactive version of  
193 FER (FERKR (K565>R) (Escobar-Restrepo et al., 2007); *FERpro:FERKR-eGFP/fer-4* line #7)  
194 and observed no decrease in FER-eGFP PM fluorescence following RALF1 treatment or  
195 mechanical stimulation (Figure 3), suggesting that the mechanism(s) controlling stimulus-  
196 induced changes in PM FER-eGFP abundance involve trans- and/or autophosphorylation by  
197 FER.

198

199 **LLG1 is required for normal FER-dependent responses and FER-eGFP endocytosis and**  
200 **degradation**

201 FERONIA and RALF peptides have been shown to physically interact in a complex with the  
202 members of the GPI-anchored LRE/LLG protein family, which function as FER co-receptors (Li  
203 et al., 2015; Xiao et al., 2019). To determine whether LLG1 modulates FER-dependent ion  
204 signaling, we analyzed  $[Ca^{2+}]_{\text{cyt}}$  and pH responses of *llg1* loss-of-function mutants in response to  
205 RALF1 and mechanical stimulation. In WT roots, RALF1 elicited a rapid increase in  $[Ca^{2+}]_{\text{cyt}}$   
206 and root surface pH as well as intracellular acidification, all of which were absent in *llg1* mutants  
207 (Figure 4) as well as *fer* mutants (Supplemental Figure S5; see also Haruta et al., 2008, 2014).  
208 Bending triggered a biphasic  $[Ca^{2+}]_{\text{cyt}}$  increase in Arabidopsis wild-type (WT) roots, whereas  
209 two independent insertional mutants of LLG1, *llg1-1* and *llg1-2*, exhibited only the initial, FER-  
210 independent  $[Ca^{2+}]_{\text{cyt}}$  elevation similar to *fer* mutants (Figure 4A; see also Shih et al., 2014).  
211 Furthermore, bending-induced root surface and cytosolic pH changes were only monophasic in  
212 *llg1* mutants (Figure 4, B and C), again phenocopying the *fer* mutant's signaling defects  
213 (Supplemental Figure S5; see also Shih et al., 2014). The ion signaling response to RALF1  
214 treatment and root bending was restored in *llg1* mutants complemented with *LLG1* driven by the  
215 *LLG1* native promoter (Supplemental Figure S5). These results confirm the essential role of  
216 LLG1 in FER-dependent ion signal transduction in roots.

217  
218 Consistent with an integral role in FER-dependent signaling pathways, *llg1* null mutants  
219 exhibited defects in cell expansion similar to *fer* mutants, including severe root hair defects,  
220 impaired control of diffuse cell expansion, and misshapen and bulging hypocotyl epidermal cells  
221 (Supplemental Figures S6 and S7). *Llg1* mutants also phenocopied *fer* mutants with regard to  
222 growth responses to external mechanical challenges, showing both pronounced right-handed  
223 skewing and abnormal barrier tracking responses (Supplemental Figure S8). Complementation of  
224 *llg1* restored normal mechanical development.

225  
226 Given that *llg1* and *fer* mutants have virtually identical root signaling and developmental defects,  
227 we investigated whether mis-expression or mis-localization of FER in the *llg1* mutant  
228 background could account for *fer*-related phenotypes as previously proposed (Li et al., 2015;  
229 Shen et al., 2017). We introduced *FERpro:FER-eGFP* into the *llg1-2* mutant background and  
230 found that transgenic *llg1* seedlings showed the same FER-eGFP expression patterns and  
231 subcellular localization as *FERpro:FER-eGFP/fer-4* lines. In both *llg1* and *fer-4* backgrounds,

232 FER-eGFP was clearly localized to the PM as well as intracellular punctae in epidermal cells of  
233 the root and cotyledon (Figure 3, Supplemental Figure S9). This suggests that loss of LLG1  
234 abolishes FER-dependent mechanical signaling by affecting FER activity rather than FER  
235 trafficking to the PM.

236

237 LLG1 is also required for stimulus-dependent control of FER PM abundance. *Llg1-2* mutants  
238 expressing *FERpro:FER-eGFP* showed no decrease in PM FER-eGFP fluorescence in epidermal  
239 cells of roots and cotyledons following either 1 h of RALF1 treatment or mechanical stimulation  
240 (Figure 3). Such an essential role for LLG1 in stimulus-induced modulation of FER-eGFP PM  
241 levels is consistent with its requirement for FER-dependent signaling and its physical interaction  
242 with FER in a heteromeric receptor complex (Xiao et al., 2019).

243

#### 244 **Mechanically induced loss of PM FER-eGFP is insensitive to inhibitors of the** 245 **endocytic/endosomal degradation pathway**

246 Ligand-induced degradation of PM receptors is typically mediated by endocytosis and  
247 subsequent endosomal trafficking of the receptors to the vacuole. As we had not been able to  
248 detect an increase in FER-eGFP-labeled vesicles or endosomes after stimulation, we used a  
249 pharmacological approach to interrupt this pathway prior to cargo delivery to the vacuole. We  
250 first treated seedlings with 2  $\mu$ M concanamycin A (ConcA), an inhibitor of the V-type H<sup>+</sup>-  
251 ATPase, to inhibit late endosome formation and thus degradation of internalized FER proteins  
252 (Huss et al., 2002; Ben Khaled et al., 2015). As anticipated, pre-incubation with ConcA triggered  
253 a more than sevenfold increase in the number of fluorescently labeled endosomes in RALF1-  
254 treated cotyledons (Figure 5). Conversely, no increase in labeled endosomes was detected in  
255 FERKR-eGFP-expressing seedlings pretreated with ConcA (Figure 5B), consistent with the lack  
256 of FERKR-eGFP internalization described above.

257

258 Surprisingly, the number of fluorescently labeled intracellular punctae also did not increase in  
259 ConcA-pretreated cotyledons after wounding, suggesting that the decrease in FER-eGFP PM  
260 fluorescence observed in response to mechanical perturbation does not involve the endosomal  
261 degradation pathway (Figure 5B).

262

263 To further verify that RALF1 and wounding trigger FER degradation via different pathways, we  
264 incubated seedlings with 30  $\mu$ M wortmannin (Wm), which is known to inhibit clathrin-mediated  
265 endocytosis (Emans et al., 2002; Takagi and Uemura, 2018). As expected, preincubation with  
266 Wm for 30 min blocked the disappearance of PM-localized FER-eGFP upon RALF1 treatment  
267 (Figure 6). Wortmannin-pretreated seedlings still exhibited a normal RALF1-induced  
268  $[Ca^{2+}]_{cyt}$  increase, indicating that Wm did not generally reduce sensitivity to RALF1  
269 (Supplemental Figure S2C). In contrast, Wm pretreatment did not impair the wounding-induced  
270 loss of PM FER-eGFP fluorescence (Figure 6, A and C).

271 These results were further corroborated when we blocked clathrin-mediated endocytosis  
272 using the recently developed Endosidin 9-17 (ES9-17), a specific inhibitor of clathrin heavy  
273 chain function (Dejonghe et al., 2019). Pretreatment with 30  $\mu$ M ES9-17 for 30 min abolished  
274 the RALF1-induced reduction in FER-eGFP PM fluorescence, while ES9-17 had no effect on  
275 either the wounding- or bending-induced reduction in FER-eGFP PM fluorescence (Figure 6, B  
276 and C).

277 Taken together, these results provide evidence that the decrease in PM FER-eGFP  
278 fluorescence in response to mechanical stimulation occurs via a pathway that is distinct from the  
279 previously established clathrin-mediated, RALF1-induced FER endocytosis pathway (Yu et al.,  
280 2020).

## 281 282 **Mechanical stimulation triggers cysteine protease-dependent degradation of FER-eGFP**

283 To determine whether FER-eGFP is targeted for degradation upon mechanical stimulation, we  
284 treated seedlings with MG132, an inhibitor commonly used to block proteasomal degradation by  
285 the 26S proteasome (Lee and Goldberg, 1998). Preincubation with 50  $\mu$ M MG132 for 30 min  
286 completely abolished the reduction in FER-eGFP PM fluorescence upon mechanical wounding  
287 and bending but did not affect the RALF1 response (Figure 7, Supplemental Figure S10).

288 Surprisingly, lactacystin, a more specific inhibitor of the 26S proteasome (Fenteany et al., 1995),  
289 did not inhibit the wounding-induced reduction of the FER-eGFP PM fluorescence, suggesting  
290 that the effect of MG132 was independent of the 26S proteasome (Figure 7, A and B,  
291 Supplemental Figure S10).

292



293 Unlike lactacystin, MG132 is known to also inhibit the activity of several cysteine proteases,  
294 including calpains (Tsubuki et al., 1996). We therefore decided to further investigate the  
295 involvement of these cysteine proteases in mechanically-induced loss of PM FER-eGFP  
296 fluorescence. Intriguingly, two different calpain inhibitors, calpeptin and ALLN (Ono et al.,  
297 2016), and two different metacaspase inhibitors, MALT1 Inhibitor 1 (MI-2) and Z-VRPR-fmk  
298 (Hander et al., 2019), completely abolished the decrease in PM FER-eGFP abundance  
299 specifically after mechanical stimulation (Figure 7, A and B, Supplemental Figures S10 and  
300 S11), suggesting that the loss of PM fluorescence may be the result of FER-eGFP degradation or  
301 cleavage by cysteine proteases in the calpain and/or metacaspase families.

302

303 To verify that loss of PM fluorescence was accompanied by a reduction in FER-eGFP protein  
304 levels, we immunoblotted protein extracted from seedlings stimulated by RALF1/wounding  
305 treatment in the absence or presence of protease inhibitors (Figure 7C, Supplemental Figure  
306 S12). While we did not detect any fragment that would correspond to a product of C-terminal  
307 FER-eGFP cleavage, the Western blots did show a clear reduction in full-length FER-eGFP  
308 levels upon wounding and RALF1 exposure. In agreement with our imaging data, the wounding-  
309 induced FER-eGFP decrease was inhibited by MG132 and ALLN but not the 26S proteasome  
310 inhibitor lactacystin, while the RALF1-induced decrease was not sensitive to any of these drugs,  
311 indicating that FER undergoes differential, stimulus-dependent processing.

312

313



## 314 DISCUSSION

315 In this paper, we have shown that PM localization of the RLK FER is dynamically regulated not  
316 only by RALF1, but also by other stimuli known to activate FER-dependent signaling cascades.  
317 Exposure to Arabidopsis RALF1, a fungal (*Fusarium oxysporum*)-RALF, mechanical bending of  
318 roots and hypocotyls, and mechanical wounding of cotyledons led to a 20-40% reduction in PM  
319 FER-eGFP fluorescence within 1 h of the start of each treatment (Figure 1). These treatments did  
320 not affect the abundance of the PM marker RCI2B/LTI6B or the flg22 receptor FLS2 (Figures 1  
321 and 2), indicating that the responses are at least partially specific to FER. Given that inhibition of  
322 Ca<sup>2+</sup> signaling, disruption of FER kinase activity, and lack of the FER co-receptor LLG1 all  
323 abolished the stimulus-induced loss of PM FER-eGFP, the response further seems to be  
324 conditioned on an operational FER signal transduction machinery (Figure 3).

325  
326 FERONIA PM abundance appears to be post-translationally controlled via distinct mechanisms.  
327 Some environmental conditions, such as salt stress, trigger the internalization of assorted PM  
328 proteins, including FER, PIN1 and PIN2, BRI1, PIP2;1, and RCI2B/LTI6B (Li et al., 2011;  
329 Zwiewka et al., 2015; Zhao et al., 2018) (Supplemental Figure S4). This is likely a general  
330 cellular mechanism to quickly adjust cell surface area to a shrinking volume and is not dependent  
331 on activation of FER signaling pathways (Supplemental Figure S4), consistent with a role for  
332 FER in the recovery phase to salt stress rather than early signaling events (Feng et al., 2018). In  
333 contrast, FER-eGFP was at least somewhat selectively removed from the PM upon RALF1-  
334 treatment and mechanical stress (Figures 1 and 2), i.e., in response to activation of signal  
335 transduction pathways where FER plays an essential role in the earliest phases of signaling  
336 (Haruta et al., 2014; Shih et al., 2014). Moreover, FER-eGFP removal was insensitive to  
337 treatment with the FLS2 ligand flg22 (see also Zhao et al., 2018), even though FER is known to  
338 interact with FLS2 and has been shown to modulate FLS2-BAK1 receptor complex formation  
339 (Stegmann et al., 2017).

340  
341 Surprisingly, given the shared requirement for early signaling components such as the presence  
342 of the co-receptor LLG1, elevation of cytosolic Ca<sup>2+</sup> concentration and  
343 auto/transphosphorylation, the specific FER degradation pathways activated by mechanical  
344 stimulation and RALF1 appear to diverge downstream of these signaling events. As recently

345 shown (Yu et al., 2020) and confirmed in our pharmacological assays, RALF1 elicits FER  
346 degradation via the well-established clathrin-mediated endocytosis/endosomal pathway  
347 previously described for PAMP-activated RLKs (Paez Valencia et al., 2016). In seedlings  
348 pretreated with the V-type H<sup>+</sup> ATPase inhibitor ConcA, RALF1-induced loss of FER-eGFP from  
349 the PM was associated with its appearance in intracellular punctae (Figure 5), and both Wm and  
350 ES9-17 blocked the PM signal reduction (Figure 6), while inhibitors of proteasomal degradation  
351 or cysteine proteases had no effect (Figure 7).

352

353 Conversely, none of the inhibitors of the endocytic/endosomal pathway interfered with loss of  
354 PM FER-eGFP fluorescence induced by mechanical stimulation (Figures 5 and 6). Given the  
355 insensitivity to ConcA, we conclude that mechanically-induced degradation does not proceed via  
356 the endosomal or selective autophagy pathways, as both pathways are known to be disrupted by  
357 the inhibition of the V-type H<sup>+</sup> ATPase (Bassham et al., 2006; Dettmer et al., 2006; Yang et al.,  
358 2019). Instead, mechanically-induced FER-eGFP degradation was highly sensitive to cysteine  
359 protease inhibitors (Figure 7). The *Arabidopsis thaliana* genome encodes a large number of  
360 cysteine proteases. Among these, cytosolic type II metacaspases are attractive candidates as they  
361 have been shown to cleave tonoplast-localized PROPEP precursors in a Ca<sup>2+</sup>-dependent manner  
362 in response to wounding and flg22 treatment (Hander et al., 2019; Shen et al., 2019). Another  
363 attractive candidate is DEK1, the only plant calpain, which has been implicated in mechanical  
364 signal transduction. DEK1 consists of a cytosolic calpain domain linked to a large membrane  
365 spanning region (Lid et al., 2002). The transmembrane domain appears to function either as a  
366 mechanically activated Ca<sup>2+</sup> channel or as a mechanosensitive regulator of a Ca<sup>2+</sup> channel (Tran  
367 et al., 2017), whereas DEK1 calpain activity is enhanced by Ca<sup>2+</sup> (Wang et al., 2003), consistent  
368 with our observation that mechanically-induced FER-eGFP degradation requires Ca<sup>2+</sup> signaling  
369 (Figure 3). Whether a type II metacaspase and/or DEK1 are indeed involved in the degradation  
370 of FER-eGFP remains to be determined.

371

372 How precisely FER-eGFP is processed at the plasma membrane is currently not known. Unlike  
373 the recent report of cysteine-protease inhibitor-sensitive cleavage of BAK1 (Zhou et al., 2019),  
374 we did not detect a C-terminal fragment that would result from the hydrolysis of a single peptide  
375 bond (simple cleavage); FER-eGFP may thus have been completely degraded. Alternatively, if

376 the unknown cysteine protease(s) only had access to the cytoplasmic domain of FER, it is  
377 conceivable that an N-terminal FER fragment remained associated with the plasma membrane or  
378 was released into the cell wall space and retained some function. Such proteolytic cleavage has  
379 been reported for multiple animal tyrosine receptor kinases (Huang, 2021), but has also been  
380 observed in plants for the chitin-binding LysM-RLKs CERK1 and LYK4 under control  
381 conditions (i.e., in the absence of any particular stimulus) (Petutschnig et al., 2014). In the latter  
382 examples, the ectodomains of CERK1 and LYK4 were shed, while the CERK1 kinase domain  
383 likely remained associated with the plasma membrane. Determining whether FER ectodomains  
384 also persist after wounding, either as soluble fragments or bound to the membrane, will be key to  
385 understanding whether different cellular fates of FER have functional significance for the diverse  
386 signaling pathways FER is involved in.

387  
388 One of the most interesting questions emerging from our investigation is how different stimuli  
389 can activate different degradation pathways for the same receptor. Differential phosphorylation  
390 of FER is an obvious candidate mechanism as FER kinase activity is required for degradation in  
391 response to both mechanical and RALF1 stimuli (Figure 3). Indeed, distinct FER  
392 phosphorylation patterns have already been detected in phosphoproteomic analyses under  
393 different experimental conditions. For example, FER phosphorylation has been detected at amino  
394 acids S<sup>858</sup>, S<sup>871</sup>, and S<sup>874</sup> upon RALF1 treatment (Haruta et al., 2014), while S<sup>695</sup>, T<sup>696</sup>, and S<sup>701</sup>  
395 were phosphorylated after exposure to flg22 (Nühse et al., 2004). Such treatment-dependent  
396 differential phosphorylation may mark FER for distinct cell fates. Some exciting recent work has  
397 revealed the importance of the phosphocode for receptor activity (Perraki et al., 2018; Latorraca  
398 et al., 2020), and at least for the well-studied receptor tyrosine kinase MET, it has been shown  
399 that the presence of receptor phosphorylation at a juxtamembrane tyrosin recruits a ubiquitin  
400 ligase, leading to internalization and lysosomal degradation, and impedes caspase-mediated  
401 proteolytic cleavage of MET (Fernandes et al., 2019). It remains to be determined if FER  
402 residues are phosphorylated in response to mechanical wounding and if the resulting  
403 phosphorylation pattern is specific to this signal transduction pathway.

404  
405 Another important question relates to the functional significance of the divergent cellular fates of  
406 FER. Receptor signaling post internalization has been demonstrated in animals, where, for

407 instance, MET was found to be capable of modulating the actin cytoskeleton through different  
408 pathways depending on its endosomal localization (Ménard et al., 2014). Post-internalization  
409 signaling has also been suggested to occur in response to RALF1 treatment, as RALF1-triggered  
410 root growth inhibition was found to be reduced in mutants defective in clathrin-mediated  
411 endocytosis (Yu et al., 2020).

412

413 RALF-regulated abundance of FER at the plasma membrane may also be an important element  
414 determining the virulence of fungal pathogens. Given that *Fusarium oxysporum* F-RALF was  
415 equally effective at triggering a decrease in PM FER-eGFP as endogenous RALF1 (Figure 2),  
416 we speculate that fungi are coopting RALF1-induced FER endocytosis and degradation in order  
417 to inhibit FER-supported defense signaling. Indeed, (Masachis et al., 2016) found that immune  
418 responses of tomato roots were enhanced when infected with a mutant *F. oxysporum* strain  
419 lacking the *F-RALF*-encoding gene, suggesting that F-RALF of WT *F. oxysporum* plays a role in  
420 suppressing host immunity. Interestingly, (Thynne et al., 2017) observed no significant  
421 difference in the virulence of *f-ralf* knockout *F. oxysporum* strains. Our data may explain these  
422 contradictory results. Unlike Masachis et al., Thynne et al. first wounded the plant roots prior to  
423 inoculating them with the mutant *F. oxysporum*, which may have triggered proteolytic  
424 processing of tomato FER well before exposure to the fungus, possibly preventing F-RALF from  
425 having an effect on virulence.

426

427 If N-terminal FER cleavage products remain associated with the plasma membrane, these could  
428 retain some non-kinase-dependent activity. FERONIA is proposed to function as a scaffold to  
429 facilitate interaction of immune receptors EFR and FLS2 with their BAK1 co-receptor  
430 (Stegmann et al., 2017), and it is possible that a truncated FER continues to regulate receptor-  
431 complex formation. Interestingly, it was recently demonstrated that FER kinase activity is not  
432 required for its role in immune signaling (Gronnier et al., 2020); whether the presence of the  
433 intracellular kinase domain is necessary remains to be seen.

434

435 In conclusion, we have shown that the abundance of full-length FER at the plasma membrane is  
436 regulated in a stimulus-dependent manner via distinct processes, that nevertheless all require  
437 FER signaling competency. Whether there are separate pools of FER targeted for differential

438 processing by different signal transduction pathways, which post-translational modifications  
439 underlie the different cellular fates of FER, and what the functional significance is of these  
440 different fates are exciting questions for future research.

441

442

## 443 METHODS

### 444 *Plant material and growth conditions*

445 *Arabidopsis thaliana* seeds were surface sterilized with 50% bleach and plated on 1% agar  
446 containing ¼-strength Murashige and Skoog salts (MP Biomedicals) and 1% sucrose at pH 5.8.  
447 They were stratified for 2 d at 4°C and grown for 4-5 d at 22°C under continuous light. Seeds of  
448 the *Arabidopsis* T-DNA insertion mutants *fer-4* (GABI\_106A06), and *llg1-1* (SAIL\_47\_G04),  
449 *llg1-2* (SALK\_086036) were obtained from the *Arabidopsis* Biological Research Center  
450 (ABRC). *35Spro:eGFP-RCI2B* seeds (Cutler et al., 2000) were obtained from ABRC courtesy of  
451 Dr. Marisa Otegui (University of Wisconsin, Madison). Seeds of transgenic *Arabidopsis*  
452 expressing *FLS2pro:FLS2-3xMyc-eGFP* (Robatzek et al., 2006) were obtained from Dr. Antje  
453 Heese (University of Missouri) with kind permission of Dr. Silke Robatzek (Ludwig Maximilian  
454 University of Munich).

455

### 456 *Plasmid construction and plant transformation*

457 *Llg1* loss-of-function mutants were complemented with *LLG1pro:LLG1-GFP* constructs. The  
458 promoter region was identified with the help of the *Arabidopsis* Gene Regulatory Information  
459 Server (AGRIS) resource. The constructs were cloned by first amplifying *LLG1pro:LLG1* from  
460 genomic DNA using a forward primer annealing to the 5'-end of the predicted *LLG1* promoter  
461 region and containing a *Sall* restriction site (5'-  
462 AGgtcgacGAAGTTTCGGTTTATATTTGATTATCTAA-3') and a reverse primer directed to  
463 the 3'-end of the *LLG1* coding sequence and containing a *NotI* restriction site (5'-  
464 TTgcgccgcGAGAACAACCTTAACAAAAA -3'). The *LLG1pro:LLG1* fragment was subcloned  
465 into the Gateway pENTR1a vector (Life Technologies) and recombined into the modified  
466 Gateway-compatible destination vector pEarleyGate302 (Earley et al., 2006). Constructs were  
467 introduced into *Agrobacterium tumefaciens* strain GV3101 and transformed into *Arabidopsis*  
468 plants via floral infiltration. *FERpro:FER-eGFP* and *FERpro:FERKR-eGFP* *Arabidopsis* lines  
469 were created as described by Shih et al. (2014).

470

### 471 *FER-GFP fluorescence assays*

### 472 *Fluorescence microscopy*

473 Fluorescence of GFP-tagged FER, RCI2B, and FLS2 was monitored using a Zeiss LSM 510  
474 META confocal microscope and a 40x 1.2 NA C-Apochromat water immersion objective. eGFP  
475 was excited with the 488 nm line of an argon laser, and emission was collected with a 488 nm  
476 beamsplitter and a 505-550 nm band pass emission filter. Eight bit, 512 px × 512 px images  
477 were acquired with scan times of 1.97s and 2× line averaging.

478

479 Images were processed in ImageJ (<http://rsbweb.nih.gov/ij/>), and the data were analyzed with  
480 Microsoft Excel. Plasma membrane fluorescence was quantified by carefully outlining the  
481 plasma membrane as shown in Supplemental Figure 1 and measuring the average signal  
482 intensity. Three representative, in-focus cells in each image for each seedling were selected and  
483 averaged. Ratios of fluorescence intensities (post treatment/pretreatment) were used to normalize  
484 the data as different seedlings expressing the same construct exhibited quite variable baseline  
485 fluorescence intensities. Gray scale images of FER-eGFP fluorescence were transformed into  
486 pseudo-color using the Royal LUT in ImageJ for better visualization of fluorescence intensities.

487

488 Endosomes were quantified as described by Leslie & Heese (2017). In brief, segmentation  
489 analysis was performed in ImageJ to select the endosomes in an automated fashion without  
490 selecting the plasma membrane or other fluorescent particles, and the number of endosomes was  
491 counted. Note that while we previously had to use a lower excitation laser intensity for the  
492 FERKR line to avoid signal saturation and could thus have missed a reduction in fluorescence  
493 intensity if the decrease was of the same absolute magnitude as observed for FER-eGFP, for  
494 endosomal analysis we imaged cotyledons using the same settings as for FER-eGFP (i.e.,  
495 settings under which the PM signal was saturated).

496

#### 497 RALF treatment

498 Seedlings were treated either with synthetic RALF1, corresponding to the mature Arabidopsis  
499 RALF1 (ATTKYISYQSLKRNSVPCSRRGASYNCQNGAQANPYSRGCSKIARCRS;  
500 Biomatik) or synthetic fungal RALF, corresponding to the RALF produced by *Fusarium*  
501 *oxysporum* f. sp. *lycopersici* 4287  
502 (SGEISYGALNRDHIPCSVKGASAANCRPGAEANPYNRGCAIEKCRGGV; GenScript;  
503 Thynne et al., 2017).



504

505 For root imaging assays, 4- to 5-d-old Arabidopsis seedlings expressing GFP-tagged FER,  
506 RCI2B, and FLS2 were transferred to experimental chambers and embedded in 1% agar  
507 containing ¼-strength Murashige and Skoog (MS) salts and 1% sucrose, pH 5.8. Seedlings were  
508 kept in these chambers overnight in a vertical orientation to let them acclimate and to recover  
509 from mechanical perturbation during transfer (for a detailed description, see Bhat et al., 2021).  
510 Fluorescence in epidermal cells of the root elongation zone was imaged before and 1 h after agar  
511 was carefully cut away from the root tips and 5 µM RALF (dissolved in ¼ MS and 1% sucrose,  
512 pH 5.8) was added. Incubation with ¼ MS with 1% sucrose at pH 5.8 without RALF was used as  
513 a control.

514

515 For cotyledon imaging assays, 4- to 5-d-old Arabidopsis seedlings were selected based on  
516 detectable fluorescence in cotyledon pavement cells. Each selected seedling was fully immersed  
517 for 1 h in a 0.2 mL PCR tube containing either 10 µM RALF in ¼ MS and 1% sucrose, pH 5.8,  
518 or the control solution, ¼ MS and 1% sucrose, pH 5.8, without RALF. Cotyledons of each  
519 seedling were imaged before and 1 h after treatment.

520

521

### 522 Mechanical stimulation

523 For bending assays, 4-d-old Arabidopsis seedlings were transferred to experimental chambers  
524 and embedded in 2% agar containing ¼ MS and 1% sucrose, pH 5.8. Seedlings were kept in  
525 these chambers overnight in a vertical orientation. During the experiment, the roots or  
526 hypocotyls were gently bent approximately 90° with forceps for about 2 s and released. Because  
527 it was difficult to keep exactly the same cells in the field of view before and after bending, cells  
528 in the bent region were imaged immediately after and then again 1 h after bending. Unbent  
529 seedlings served as a control.

530

531 For wounding assays, 4- to 5-d-old Arabidopsis seedlings were selected based on detectable  
532 fluorescence in cotyledon pavement cells. One cotyledon from each selected seedling was  
533 detached just above the petiole using scissors and placed in ¼ MS and 1% sucrose, pH 5.8,



534 alongside the wounded seedling. Fluorescence was imaged before and 1 h after wounding. All  
535 data is for the detached cotyledon unless otherwise noted.

536

#### 537 *flg22 treatment*

538 Four- to five-day-old Arabidopsis seedlings with detectable fluorescence in cotyledon pavement  
539 cells were fully immersed for 1 h in Eppendorf tubes containing either 10  $\mu\text{M}$  flg22 (Alpha  
540 Diagnostic International, Inc.) dissolved in  $\frac{1}{4}$  MS and 1% sucrose, pH 5.8, or the control  
541 solution,  $\frac{1}{4}$  MS and 1% sucrose, pH 5.8, without flg22. One cotyledon of each seedling was  
542 imaged before and after treatment.

543

#### 544 *Inhibitor experiments*

545 The protocol followed was the same as described above for RALF1 and mechanical stimulation,  
546 but seedlings were pre-incubated with one of the following inhibitors for the indicated amount of  
547 time: 2  $\mu\text{M}$  concanamycin A (1 h pre-incubation; BioViotica), 30  $\mu\text{M}$  wortmannin (30 min pre-  
548 incubation; LC Laboratories), 30  $\mu\text{M}$  endosidin 9-17 (30 min pre-incubation; Carbosynth Ltd.),  
549 50  $\mu\text{M}$  MG132 (30 min pre-incubation; Enzo), 25  $\mu\text{M}$  lactacystin (30 min pre-incubation;  
550 AdipoGen), 20  $\mu\text{M}$  calpeptin (30 min pre-incubation; Sigma-Aldrich), 20  $\mu\text{M}$  ALLN (30 min  
551 pre-incubation; MilliporeSigma), 50  $\mu\text{M}$  Z-VRPR-fmk (30 min pre-incubation; Enzo), 10  $\mu\text{M}$   
552 MALT1 Inhibitor I (30 min pre-incubation; EMD Millipore Corp), and 300  $\mu\text{M}$   $\text{LaCl}_3$  (in  
553 phosphate free  $\frac{1}{4}$  MS and 1% sucrose; 15 min pre-incubation; Acros).

554

#### 555 *Ion imaging*

556 Monitoring of root surface and cytosolic pH changes in response to RALF1 or mechanical  
557 bending was performed essentially as previously described by (Monshausen et al., 2009, 2011).  
558 In brief, Arabidopsis seedlings were embedded in agar containing 10% Hoagland medium and  
559 1% sucrose,  $\sim\text{pH}$  5.1. After a recovery period of 4-6 h, the agar was cut away from the root tips  
560 and replaced with liquid medium. For cytosolic pH measurements, the medium consisted of 10%  
561 Hoagland medium and 1% sucrose,  $\sim\text{pH}$  5.1; for root surface pH measurements the medium was  
562 additionally supplemented with 150  $\mu\text{g ml}^{-1}$  of the pH-sensitive fluorophore fluorescein  
563 conjugated to 10 kDa dextran (Sigma-Aldrich). Seedlings were then either bent by 60-90° using  
564 a glass capillary or treated with an equal volume of medium containing 10 or 20  $\mu\text{M}$  RALF

565 peptides, for a final concentration of 5 or 10  $\mu$ M. To measure cytosolic pH, the pH probe GFP  
566 H148D (35Spro:GFP H148D in pEarleyGate100 (Earley et al., 2006; Monshausen et al., 2007))  
567 was stably introduced into Arabidopsis WT and mutants *fer-2*, *llg1-1* and *llg1-2*. Ratiometric  
568 imaging GFP H148D and fluorescein-dextran was performed using an inverted Zeiss LSM 510  
569 META confocal microscope and a 10X 0.3NA Plan-Neofluar objective, with line-alternating  
570 excitation at 458 nm and 488 nm, a 488 nm dichroic mirror, and 505 nm long pass emission  
571 filter. Fluorescence ratios were calibrated using a series of buffers. For calibration of  
572 extracellular pH, buffers calibrated to pH 5.0 (100 mM malic acid), pH 5.5 (100 mM succinic  
573 acid), pH 6.0 (100 mM MES), pH 6.5 (100 mM PIPES), pH 7.0 (100 mM MOPS) and pH 7.5  
574 (100 mM HEPES) were supplemented with fluorescein-dextran; for intracellular pH  
575 measurements, an endpoint calibration was performed using 100 mM  $\text{NH}_4\text{Cl}$ , pH 9.3, and 100  
576 mM  $\text{KHCO}_3$ , pH 6.2 (see (Monshausen et al., 2007)).

577

578 To image  $[\text{Ca}^{2+}]_{\text{cyt}}$ , Arabidopsis WT, *llg1-1*, and *llg1-2* seedlings stably overexpressing Yellow  
579 Cameleon 3.6 (35Spro:YC3.6 in pEarleyGate100 (Monshausen et al., 2007)) were transferred to  
580 custom-made chambers and embedded in agar containing  $\frac{1}{4}$  Murashige and Skoog medium and  
581 1% sucrose, pH 5.7. The agar was then cut away from the region of interest and replaced with a  
582 solution containing  $\frac{1}{4}$  Murashige and Skoog medium and 1% sucrose before treatment with  
583 RALF1, F-RALF1, or bending by 60-90° using a glass capillary. The sensor was excited at 458  
584 nm, and  $\text{Ca}^{2+}$ -dependent CFP and FRET emission were collected at 484-505 nm and 526-536  
585 nm, respectively.

586

587 Ion signaling was monitored in/along epidermal cells of the root elongation/mature zone and in  
588 pavement cells in cotyledons. Image J was used to calculate the ratios of pH- and  $\text{Ca}^{2+}$ -dependent  
589 fluorescence intensities in selected regions of interest.

590

### 591 *Western blotting*

592 Approximately 20 5-d-old seedlings were transferred from agar plates to Eppendorf tubes  
593 containing  $\frac{1}{4}$  MS, 1% sucrose, pH 5.8, and any indicated inhibitors. Following any necessary  
594 preincubation, seedlings were treated with 10  $\mu$ M RALF1 or wounded and let sit for 3 h, after  
595 which roots were removed immediately prior to freezing seedling shoots with liquid nitrogen.

596 The aerial tissue was ground up on ice using a plastic pestle, and protein was extracted as  
597 described by Li et al., (2014) except as noted using a buffer consisting of 10 mM Tris/Cl pH 7.5,  
598 150 mM NaCl, 0.5 mM EDTA, 1% NP-40 (VWR Life Science), 1 mM PMSF (GoldBio), 1X  
599 Halt Protease Inhibitor Cocktail (Thermo Scientific), and 1 mM DTT (GoldBio). Protein  
600 concentration was measured using the Bradford method (Bradford, 1976), and samples were  
601 diluted to equivalent concentrations with extraction buffer. Samples of about 120-160 µg were  
602 loaded into wells of a 10% Mini-PROTEAN TGX Precast Protein Gel (Bio-Rad Laboratories)  
603 and run for 2.5 h at 90 V in buffer consisting of 25 mM Tris, 192 mM glycine, and 0.1% SDS,  
604 pH 8.3. The transfer was conducted on ice for 1 h at 100 V in buffer consisting of 25 mM Tris,  
605 192 mM glycine, and 10% methanol. Antibody staining employed PBST buffer (from PBS 10X  
606 powder concentrate, Fisher BioReagents), and 10% milk was used for blocking. Gels were  
607 incubated with primary antibodies for 2 h and with horse-radish peroxidase (HRP)-conjugated  
608 secondary antibodies for 1 h. Antibody dilutions used were 1:500 for  $\alpha$ -GFP (B-2, Santa Cruz  
609 Biotechnology), 1:2500 for  $\alpha$ -calnexin (CNX1/2, Agrisera), 1:1000 for goat- $\alpha$ -mouse-HRP  
610 (AP124P, EMD Millipore), and 1:10000 for goat- $\alpha$ -rabbit-HRP (AS09 602, Agrisera). Both  
611 (FER)GFP and calnexin were visualized with the HRP substrate SuperSignal West Femto  
612 Maximum Sensitivity (Thermo Scientific) using a Konica SRX-101A.

613  
614 Western blot bands were quantified as shown in Supplemental Figure 12c-d. Lanes were selected  
615 in ImageJ and analyzed using the Gel Analyzer function. Blot density was calculated, and the  
616 density for the  $\alpha$ -GFP band was divided by the corresponding  $\alpha$ -calnexin band density to  
617 calculate relative band density.

618  
619 *Root skewing assay*

620 Arabidopsis seeds were surface sterilized and sown on 1.5% agar containing ½ Murashige and  
621 Skoog salts and 1.5% sucrose, pH 5.7, and stratified at 4°C for 2 d. The plates were placed  
622 vertically for 3 d at 21°C under 16 h long-day photoperiod and tilted to 45° for another 3 d.  
623 Plates were scanned using the Epson Perfection V700 scanner, and root skewing angles were  
624 measured using Image J.

625  
626 *Root barrier assay*

627 Four-day-old *Arabidopsis* seedlings were transferred to experimental chambers and embedded in  
628 0.7%, 2%, or 3% agar containing ¼ Murashige and Skoog salts and 1% sucrose, pH 5.7.  
629 Twelve hours later, a coverglass sliver was inserted into the agar perpendicular to the root long  
630 axis close to the root tip (Shih et al., 2014) and the chamber was placed onto the stage of a Zeiss  
631 Axioplan microscope flipped on its back for vertical stage microscopy. Images of roots were  
632 acquired using a Zeiss 5X 0.25 NA Fluar objective and Stingray camera (Allied Vision  
633 Technologies), and root angles were measured in ImageJ.

634

#### 635 *Kinematic analysis of Arabidopsis root growth*

636 Four-day-old seedlings were transferred to experimental chambers and embedded in 1% agar  
637 containing ¼ Murashige and Skoog salts and 1% sucrose, pH 5.7. After an overnight recovery  
638 period, the experimental chamber was mounted on a ZEISS Axioplan light microscope in  
639 vertical orientation. Images of growing roots were acquired every 30 s for 40 min using a Zeiss  
640 10X 0.25NA Achromplan objective and Stingray F-504B monochrome camera (Allied Vision;  
641 Exton, PA, USA). Root relative elemental growth rate profiles and root elongation zone width  
642 were calculated as described previously by Shih et al., (2014).

643

644

645 Sequence data from this article can be found in the GenBank/EMBL data libraries under  
646 soybean gene accession numbers: FER (AT3G51550), LLG1 (AT5G56170), FLS2  
647 (AT5G46330), RCI2B (AT3G05890).

648

#### 649 Supplemental Data

650 The following materials are available in the online version of this article.

651 Supplemental Figure S1. Ca<sup>2+</sup> responses to *Arabidopsis* and *Fusarium* RALF peptides.

652 Supplemental Figure S2. Quantification of FER-eGFP PM fluorescence.

653 Supplemental Figure S3. Root bending triggers a decrease in FER-eGFP PM fluorescence.

654 Supplemental Figure S4. The increase in fluorescently-labeled intracellular punctae in response  
655 to 150 mM NaCl is not specific to FER.

656 Supplemental Figure S5. pH responses to root bending and RALF1 treatment.

657 Supplemental Figure S6. Root hair and root growth phenotypes of *Arabidopsis llg1-1* mutants.

658 Supplemental Figure S7. Root and hypocotyl phenotypes of *Arabidopsis llg1* mutants.  
659 Supplemental Figure S8. *Arabidopsis llg1* mutants exhibit root growth phenotypes  
660 consistent with defects in mechanical signaling.  
661 Supplemental Figure S9. FER-eGFP shows normal subcellular localization in *llg1-2* mutants.  
662 Supplemental Figure S10. Cysteine protease inhibitors block the bending-induced reduction in  
663 FER-eGFP PM fluorescence.  
664 Supplemental Figure S11. Cysteine protease inhibitors ALLN and MI-2 block wounding-  
665 induced, but not RALF1-induced, reduction in FER-eGFP PM fluorescence.  
666 Supplemental Figure S12. Representative Western blot and quantification of band density.

667

#### 668 Acknowledgements

669 We are grateful to Dr. Marisa Otegui (University of Wisconsin, Madison), Dr. Antje Heese  
670 (University of Missouri), and Dr. Silke Robatzek (Ludwig Maximilian University of Munich) for  
671 generously sharing seeds of *Arabidopsis* mutants. We also gratefully acknowledge  
672 the *Arabidopsis* Biological Resource Center at the Ohio State University for providing  
673 insertional mutants. We would further like to acknowledge Dr. Antje Heese for guidance on how  
674 to quantify endosome formation and both Dr. Antje Heese and Linhan Sun (Pennsylvania State  
675 University) for assistance with the Western blotting protocol. The authors would further like to  
676 thank Drs. Edgar Spalding and Nathan Miller (University of Wisconsin, Madison) for making  
677 the kinematics analysis software Image Processing Toolkit v10 available. Finally, we would like  
678 to thank Drs. Aditi Bhat and Cody DePew for helpful discussions. This study was supported by  
679 NSF grant MCB1817934 and NASA grant NNX13AM47G (to G.B.M).

680

#### 681 Contributions

682 C.S.C., H.-W.S and G.B.M. designed, performed and analyzed experiments and wrote the  
683 manuscript.

684

685

686 *Arabidopsis* accessions used in this study: AT3G51550 (FER), AT5G56170 (LLG1),  
687 AT5G46330 (FLS2), AT3G05890 (RCI2B).

688

689

690

691 Figure Legends

692 Figure 1. RALF1 and mechanical stimulation trigger a decrease in Arabidopsis FER-eGFP PM  
693 abundance. A, Fluorescence intensity of native promoter-driven FER-eGFP in epidermal PM  
694 decreases following RALF1 treatment of roots and cotyledons, bending of hypocotyls, or  
695 wounding by detaching cotyledons. Representative images of treated seedlings are shown  
696 alongside the respective controls. B, 35Spro-driven PM protein eGFP-RCI2B shows no decrease  
697 in fluorescence following stimulation. Representative images are shown. C-E, Quantification of  
698 PM fluorescence changes; ratios were calculated as PM fluorescence intensity 1 h after  
699 stimulation divided by fluorescence intensity before stimulation; values <1 thus indicate a  
700 decrease in fluorescence after treatment. RCI2B, *35Spro:eGFP-RCI2B/Col-0*; FER,  
701 *FERpro:FER-eGFP/fer-4*; F-RALF, *Fusarium*-derived RALF. C, Means + SD for n = 5 (RCI2B,  
702 MS control), 6 (RCI2B RALF1), 9 (FER MS control), 23 (FER RALF), 11 (FER bending), 8  
703 (FER F-RALF) roots. D, Means + SD for n = 6 (RCI2B control), 6 (RCI2B bending), 7 (FER  
704 control), 7 (FER bending) hypocotyls. E, Means + SD for n = 4 (RCI2B control), 6 (RCI2B  
705 wounding), 6 (RCI2B RALF), 12 (FER control), 12 (FER wounding), 9 (FER RALF1), 8 (FER  
706 F-RALF) cotyledons. F, FER-eGFP PM fluorescence decreases throughout seedling in response  
707 to wounding by detaching a cotyledon. Means + SD of n = 12 (control), 12 (detached cotyledon),  
708 6 (attached cotyledon), 4 (hypocotyl), 3 (root elongation zone) measurements. Letters indicate  
709 statistically significant differences ( $p \leq 0.05$ ; two-tailed Welch's t-test).

710

711

712 Figure 2. Loss of FER-eGFP and FLS2-eGFP PM fluorescence is stimulus-specific.

713 A, Cotyledon fluorescence of native promoter-driven FER-eGFP and FLS2-eGFP before and 1 h  
714 after exposure to 10  $\mu$ M flg22. B, Quantification of plasma membrane protein-eGFP  
715 fluorescence changes in response to different stimuli; ratios were calculated as PM fluorescence  
716 intensity 1 h after stimulation divided by fluorescence intensity before stimulation. Means + SD  
717 of n = 6 (FLS2 control), 4 (RCI2B flg22), 4 (FER flg22), 6 (FLS2 flg22), 4 (FLS2 RALF1), 4  
718 (FLS2 wounding), seedlings; data for RCI2B and FER controls are taken from Figure 1. Letters  
719 indicate statistically significant differences ( $p \leq 0.05$ ; two-tailed Welch's t-test).

720

721

722 Figure 3. Stimulus-induced loss of FER-eGFP from the PM is dependent on Ca<sup>2+</sup> signaling, FER  
723 kinase activity, and the presence of LLG1. A, Cotyledon fluorescence of Arabidopsis mutants  
724 expressing FER-GFP or kinase-inactive FERKR-GFP before and 1 h after treatment with 10 μM  
725 RALF1. To inhibit Ca<sup>2+</sup> signaling, some seedlings were pretreated for 15 min with 300 μM La<sup>3+</sup>.  
726 B, Quantification of PM fluorescence changes in stimulated and corresponding control seedlings;  
727 ratios were calculated as PM fluorescence intensity 1 h after stimulation (or control) divided by  
728 fluorescence intensity before stimulation. Seedlings were stimulated either by treating with 10  
729 μM RALF1, mechanical bending of roots, or wounding by detaching cotyledons. Means + SD  
730 for cotyledon RALF1 treatment: n = 5 (FER La<sup>3+</sup>), 6 (FER La<sup>3+</sup> + RALF1), 7 (FERK control), 6  
731 (FERK RALF1), 8 (FER/*llg1* control), 7 (FER/*llg1* RALF1) seedlings; for root bending assay: n  
732 = 12 (FER La<sup>3+</sup>), 12 (FER La<sup>3+</sup> + bending), 7 (FERK control), 7 (FERK bending), 7 (FER/*llg1*  
733 control), 8 (FER/*llg1* bending); for cotyledon wounding assay: n = 5 (FER La<sup>3+</sup>), 5 (FER La<sup>3+</sup> +  
734 wounding), 9 (FERK control), 8 (FERK wounding), 8 (FER/*llg1* control), 8 (FER/*llg1*  
735 wounding); data for FER-eGFP are taken from Figure 1. Letters indicate statistically significant  
736 differences (p ≤ 0.05; two-tailed Welch's t-test).

737

738

739 Figure 4. Arabidopsis *llg1* mutants exhibit *fer*-like ion signaling responses to root bending and  
740 RALF1. A-C, Effect of 1 μM RALF1 on (A) cytosolic Ca<sup>2+</sup>, (B) surface pH, and (C) cytosolic  
741 pH in epidermal cells of WT and *llg1* root elongation zone. Means (+ or – SD) of n = (A) 4 (WT)  
742 and 5 (*llg1-1*); (B) 6 (WT), 7 (*llg1-1*); (C) 4 (WT), 5 (*llg1-1*) roots. D-F, Effect of root bending  
743 on (D) cytosolic Ca<sup>2+</sup>, (E) surface pH, and (F) cytosolic pH in epidermal cells on the convex  
744 (stretched) side of WT and *llg1* root elongation zone. Means (+ or – SD) of n = (D) 3 (WT), 4  
745 (*llg1-1*) 5 (*llg1-2*); (E) 6 (WT, *llg1-1*, *llg1-2*); (F) 4 (WT, *llg1-1*, *llg1-2*) roots.

746

747 Figure 5. RALF1-induced loss of PM FER-eGFP is accompanied by appearance of FER-eGFP  
748 labeled endosomes in the presence of concanamycin A. A, Effect of ConCA on subcellular  
749 localization of FER-eGFP in pavement cells of Arabidopsis *FERpro:FER-eGFP/fer-4*  
750 cotyledons. Seedlings were first pretreated with 2 μM ConCA for 1 h and then incubated for 1 h



751 with either 2  $\mu$ M ConcA (control; left panels) or 2  $\mu$ M ConcA + 10  $\mu$ M RALF1 (right panels).  
752 Note the appearance of fluorescent punctae after RALF1 treatment, reflecting FER-eGFP-labeled  
753 endosomes. Representative fluorescence images are shown. B, Endosomal targeting is specific to  
754 RALF1-treatment and kinase-active FER-eGFP. Note that neither eGFP-RCI2B nor FERKR-  
755 eGFP appeared in endosomes after treatment with 2  $\mu$ M ConcA + 10  $\mu$ M RALF1. Mechanical  
756 wounding of cotyledons also triggered no detectable internalization of FER-eGFP. Endosomal  
757 density was quantified by segmentation analysis. Means + SD of n = 5 (RCI2B ConcA), 5  
758 (RCI2B ConcA + RALF1), 8 (FER ConcA), 8 (FER ConcA + RALF1), 6 (FER ConcA +  
759 wounding), 5 (FERKR ConcA) and 5 (FERKR ConcA + RALF1) seedlings. Black bars, number  
760 of endosomes after 1h ConcA pretreatment; red bars, number of endosomes after 1h treatment  
761 (only ConcA or ConcA + stimulus). Letters indicate statistically significant differences between  
762 each pretreatment and corresponding post treatment ( $p \leq 0.05$ ; two-tailed Welch's t-test).

763

764

765 Figure 6. Differential effects of wortmannin and Endosisin 9-17 on RALF1- and mechanically -  
766 induced loss of FER-eGFP PM fluorescence. A, Effect of Wm on FER-eGFP PM abundance in  
767 pavement cells of Arabidopsis *FERpro:FER-eGFP/fer-4* cotyledons. Seedlings were pretreated  
768 with 30  $\mu$ M Wm for 30 min and then incubated for 1 h with either 30  $\mu$ M Wm (control; left  
769 panels) or 30  $\mu$ M Wm + 10  $\mu$ M RALF1 (middle panels), or subjected to wounding in the  
770 presence of 30  $\mu$ M Wm (right panels). Representative fluorescence images are shown. B, Effect  
771 of ES9-17 on FER-eGFP PM abundance in epidermal cells of Arabidopsis *FERpro:FER-*  
772 *eGFP/fer-4* seedlings. Seedlings were pretreated with 30  $\mu$ M ES9-17 for 30 min and then  
773 incubated for 1 h with either 30  $\mu$ M ES9-17 (control) or 30  $\mu$ M ES9-17 + 10  $\mu$ M RALF1, or  
774 subjected to mechanical stimulation by cotyledon wounding or root bending in the presence of  
775 30  $\mu$ M ES9-17. Representative fluorescence images are shown. C, Quantification of FER-eGFP  
776 PM fluorescence changes; ratios were calculated as PM fluorescence intensity 1 h after  
777 stimulation divided by fluorescence intensity before stimulation. Means + SD of n = 4 (Wm), 8  
778 (Wm + RALF1), 8 (Wm + wounding), 5 (ES9-17), 6 (ES9-17 + RALF1), 4 (ES9-17 +  
779 wounding), 8 (ES9-17 + root bending) seedlings; data for FER-eGFP MS are taken from Figure  
780 1. Letters indicate statistically significant differences ( $p \leq 0.05$ ; two-tailed Welch's t-test).

781



782  
783  
784  
785  
786  
787  
788  
789  
790  
791  
792  
793  
794  
795  
796  
797  
798  
799  
800  
801  
802  
803  
804  
805  
806  
807

Figure 7. Differential effects of protease inhibitors on RALF1- and wounding-induced FER-eGFP degradation. A, Effect of protease inhibitors on FER-eGFP PM abundance in pavement cells of Arabidopsis *FERpro:FER-eGFP/fer-4* cotyledons. Seedlings were pretreated for 30 min with either the 26S-proteasome inhibitor lactacystin, the general cysteine protease inhibitor MG132, the calpain inhibitor calpeptin or the metacaspase inhibitor Z-VRPR-fmk and then either incubated for 1h with protease inhibitor + 10  $\mu$ M RALF1 or subjected to wounding in the presence of the protease inhibitor. Representative fluorescence images before and after stimulation are shown. B, Quantification of FER-eGFP PM fluorescence changes; ratios were calculated as PM fluorescence intensity 1h after stimulation divided by fluorescence intensity before stimulation. Means + SD for control: n = 5 (MG132), 4 (lactacystin), 4 (calpeptin), 5 (Z-VRPR-fmk); for RALF1 treatment: n = 10 (MG132), 4 (lactacystin), 4 (calpeptin), 5 (Z-VRPR-fmk); for wounding assay: n = 10 (MG132), 7 (lactacystin), 4 (calpeptin), 5 (Z-VRPR-fmk) seedlings; data for FER-eGFP ‘no inhibitor’ are taken from Figure 1. C, Immunoblot analysis of total protein extracted from Arabidopsis *FERpro:FER-eGFP/fer-4* seedling shoots 3h after treatment by RALF1 exposure or wounding. The immunoblots were probed with antibodies against GFP and calnexin as indicated, with the latter used as a loading control. Blot quantification was performed by calculating the ratios of anti-GFP band density values by corresponding density values of anti-calnexin bands (see also Supplemental Figure S12). Note that pretreatment with the cysteine protease inhibitor MG132 and the calpain inhibitor ALLN inhibited wounding-induced, but not RALF1-induced FER-eGFP degradation. The shown immunoblot is representative of three biological replicates. Means + SD of n = 4 blots except for ALLN treatment (n=3); band density ratios were normalized to the untreated control (lane 2). Letters indicate statistically significant differences ( $p \leq 0.05$ ; two-tailed Welch's t-test).

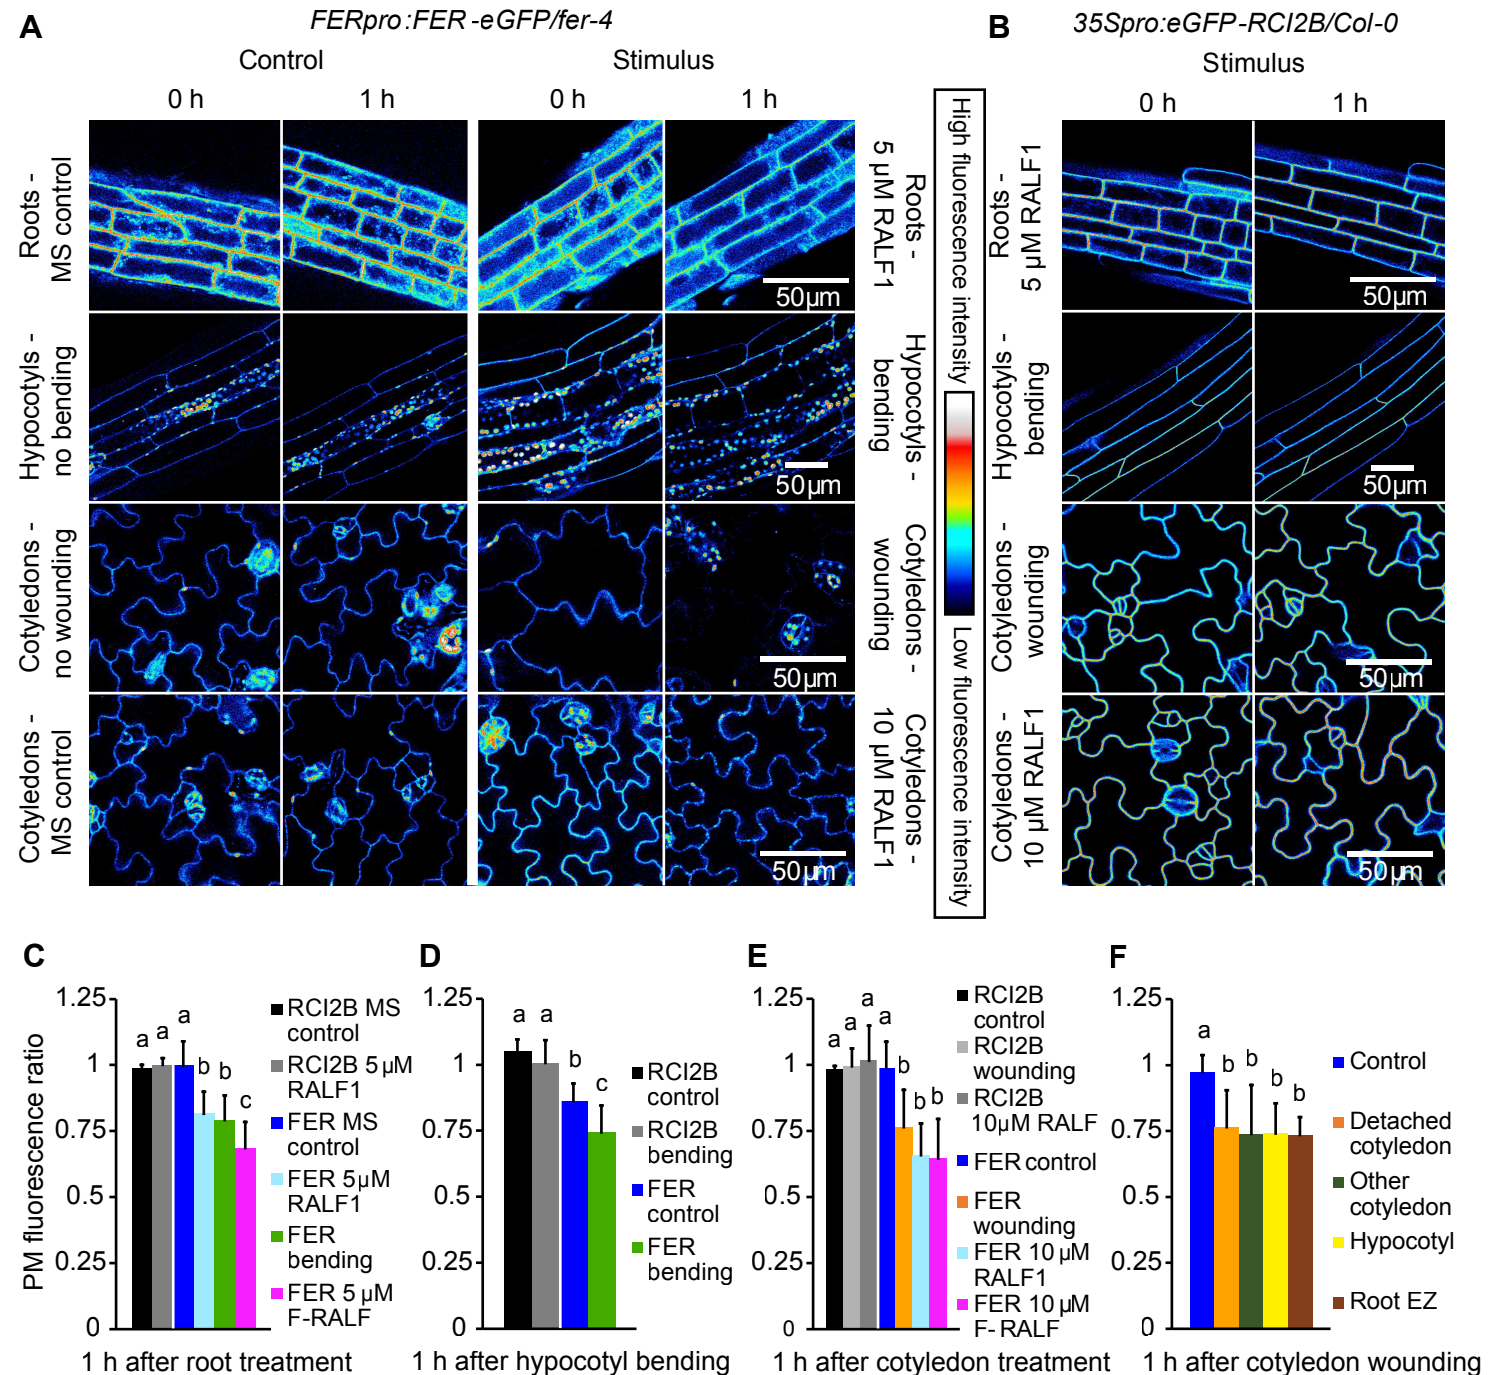

**Figure 1.** RALF1 and mechanical stimulation trigger a decrease in Arabidopsis FER-eGFP PM abundance.

A, Fluorescence intensity of native promoter-driven FER-eGFP in epidermal PM decreases following RALF1 treatment of roots and cotyledons, bending of hypocotyls, or wounding by detaching cotyledons. Representative images of treated seedlings are shown alongside the respective controls. B, 35S-driven PM protein eGFP-RCI2B shows no decrease in fluorescence following stimulation. Representative images are shown. C-E, Quantification of PM fluorescence changes; ratios were calculated as PM fluorescence intensity 1 h after stimulation divided by fluorescence intensity before stimulation; values <1 thus indicate a decrease in fluorescence after treatment. RCI2B, *35Spro:eGFP-RCI2B/Col-0*; FER, *FERpro:FER-eGFP/fer-4*; F-RALF, *Fusarium*-derived RALF. C, Means + SD for n = 5 (RCI2B, MS control), 6 (RCI2B RALF1), 9 (FER MS control), 23 (FER RALF), 11 (FER bending), 8 (FER F-RALF) roots. D, Means + SD for n = 6 (RCI2B control), 6 (RCI2B bending), 7 (FER control), 7 (FER bending) hypocotyls. E, Means + SD for n = 4 (RCI2B control), 6 (RCI2B wounding), 6 (RCI2B RALF), 12 (FER control), 12 (FER wounding), 9 (FER RALF), 8 (FER F-RALF) cotyledons. F, FER-eGFP PM fluorescence decreases throughout seedling in response to wounding by detaching a cotyledon. Means + SD of n = 12 (control), 12 (detached cotyledon), 6 (attached cotyledon), 4 (hypocotyl), 3 (root elongation zone) measurements. Letters indicate statistically significant differences ( $p \leq 0.05$ ; two-tailed Welch's t-test).

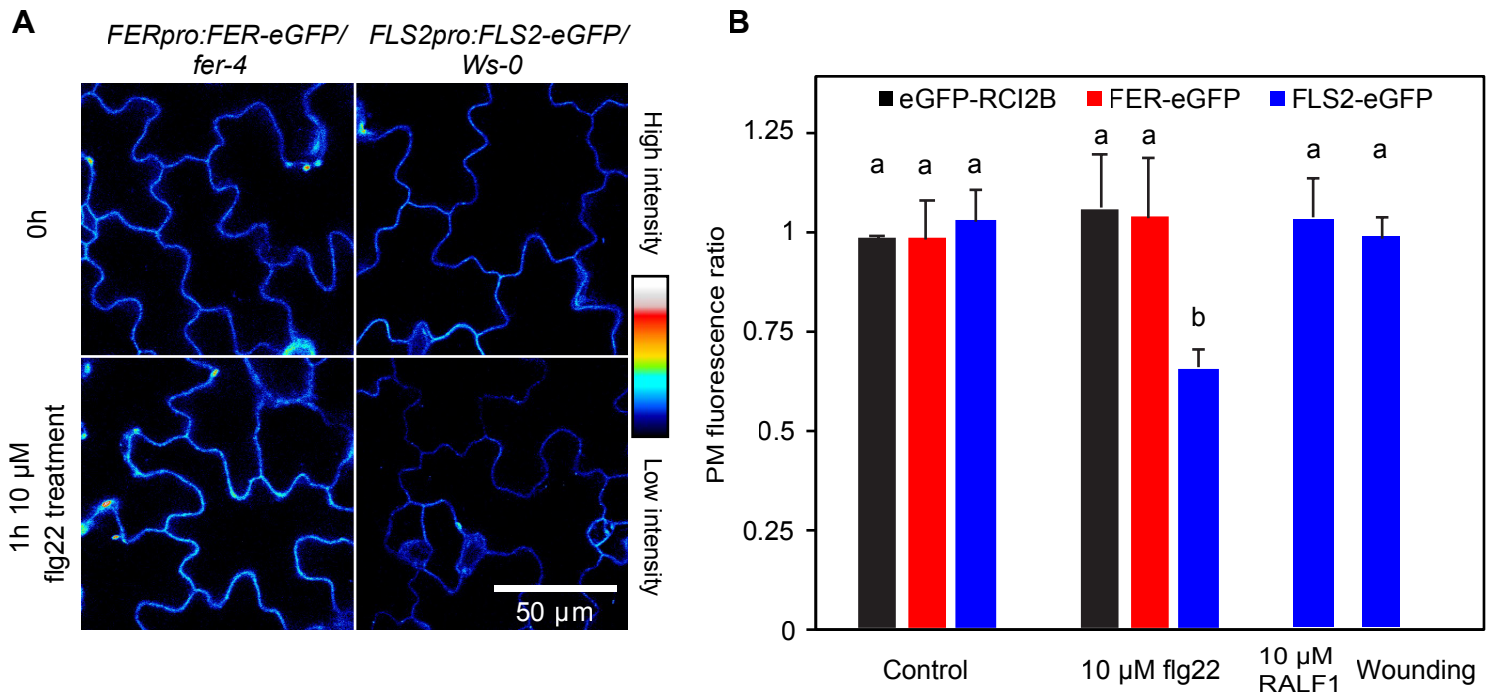

**Figure 2.** Loss of FER-eGFP and FLS2-eGFP PM fluorescence is stimulus-specific.

A, Cotyledon fluorescence of native promoter-driven FER-eGFP and FLS2-eGFP before and 1 h after exposure to 10  $\mu$ M flg22. B, Quantification of plasma membrane protein-eGFP fluorescence changes in response to different stimuli; ratios were calculated as PM fluorescence intensity 1 h after stimulation divided by fluorescence intensity before stimulation. Means + SD of n = 6 (FLS2 control), 4 (RCI2B flg22), 4 (FER flg22), 6 (FLS2 flg22), 4 (FLS2 RALF1), 4 (FLS2 wounding), seedlings; data for RCI2B and FER controls are taken from Figure 1. Letters indicate statistically significant differences ( $p \leq 0.05$ ; two-tailed Welch's t-test).



**A**

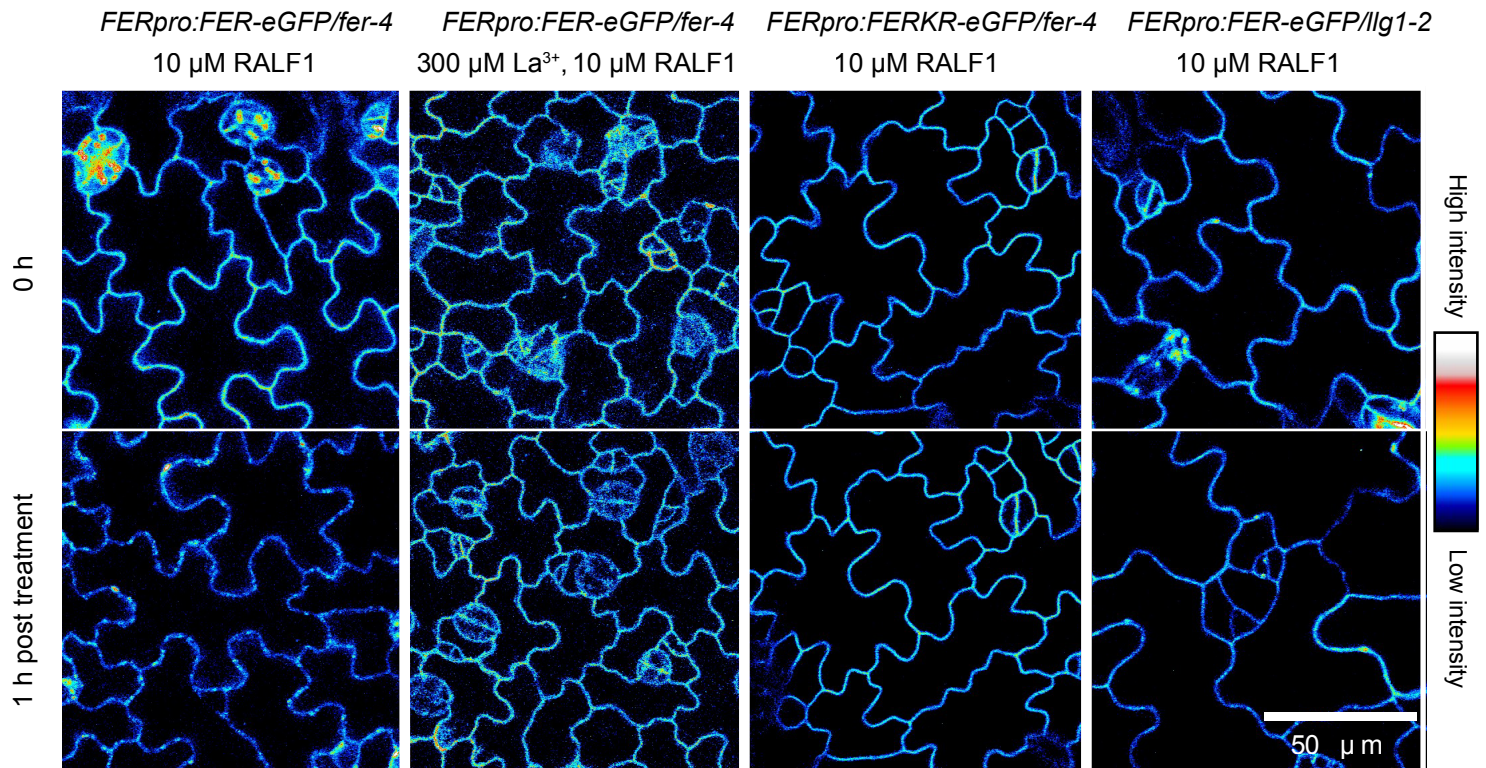

**B**

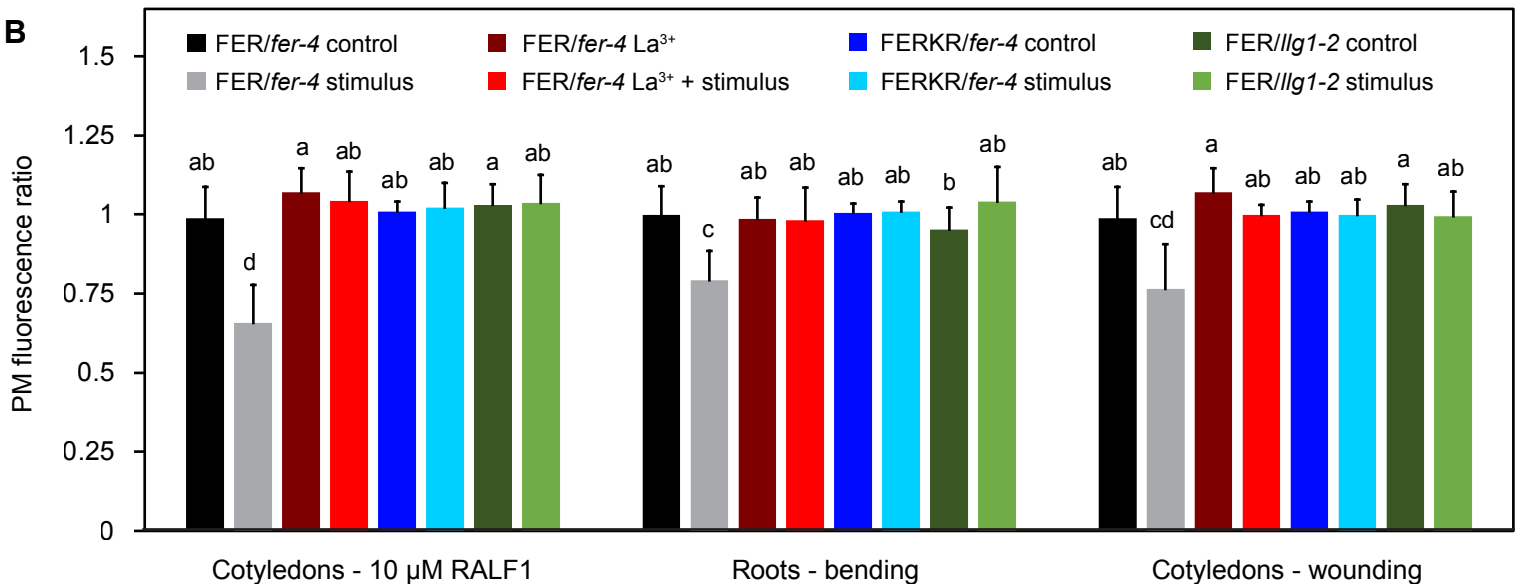

**Figure 3.** Stimulus-induced loss of FER-eGFP from the PM is dependent on Ca<sup>2+</sup> signaling, FER kinase activity, and the presence of LLG1.

A, Cotyledon fluorescence of Arabidopsis mutants expressing FER-GFP or kinase-inactive FERKR-GFP before and 1 h after treatment with 10 μM RALF1. To inhibit Ca<sup>2+</sup> signaling, some seedlings were pretreated for 15 min with 300 μM La<sup>3+</sup>. B, Quantification of PM fluorescence changes in stimulated and corresponding control seedlings; ratios were calculated as PM fluorescence intensity 1 h after stimulation (or control) divided by fluorescence intensity before stimulation. Seedlings were stimulated either by treating with 10 μM RALF1, mechanical bending of roots, or wounding by detaching cotyledons. Means + SD for cotyledon RALF1 treatment: n = 5 (FER La<sup>3+</sup>), 6 (FER La<sup>3+</sup> + RALF1), 7 (FERK control), 6 (FERK RALF1), 8 (FER/llg1 control), 7 (FER/llg1 RALF1) seedlings; for root bending assay: n = 12 (FER La<sup>3+</sup>), 12 (FER La<sup>3+</sup> + bending), 7 (FERK control), 7 (FERK bending), 7 (FER/llg1 control), 8 (FER/llg1 bending); for cotyledon wounding assay: n = 5 (FER La<sup>3+</sup>), 5 (FER La<sup>3+</sup> + wounding), 9 (FERK control), 8 (FERK wounding), 8 (FER/llg1 control), 8 (FER/llg1 wounding); data for FER-eGFP are taken from Figure 1. Letters indicate statistically significant differences (p ≤ 0.05; two-tailed Welch's t-test).

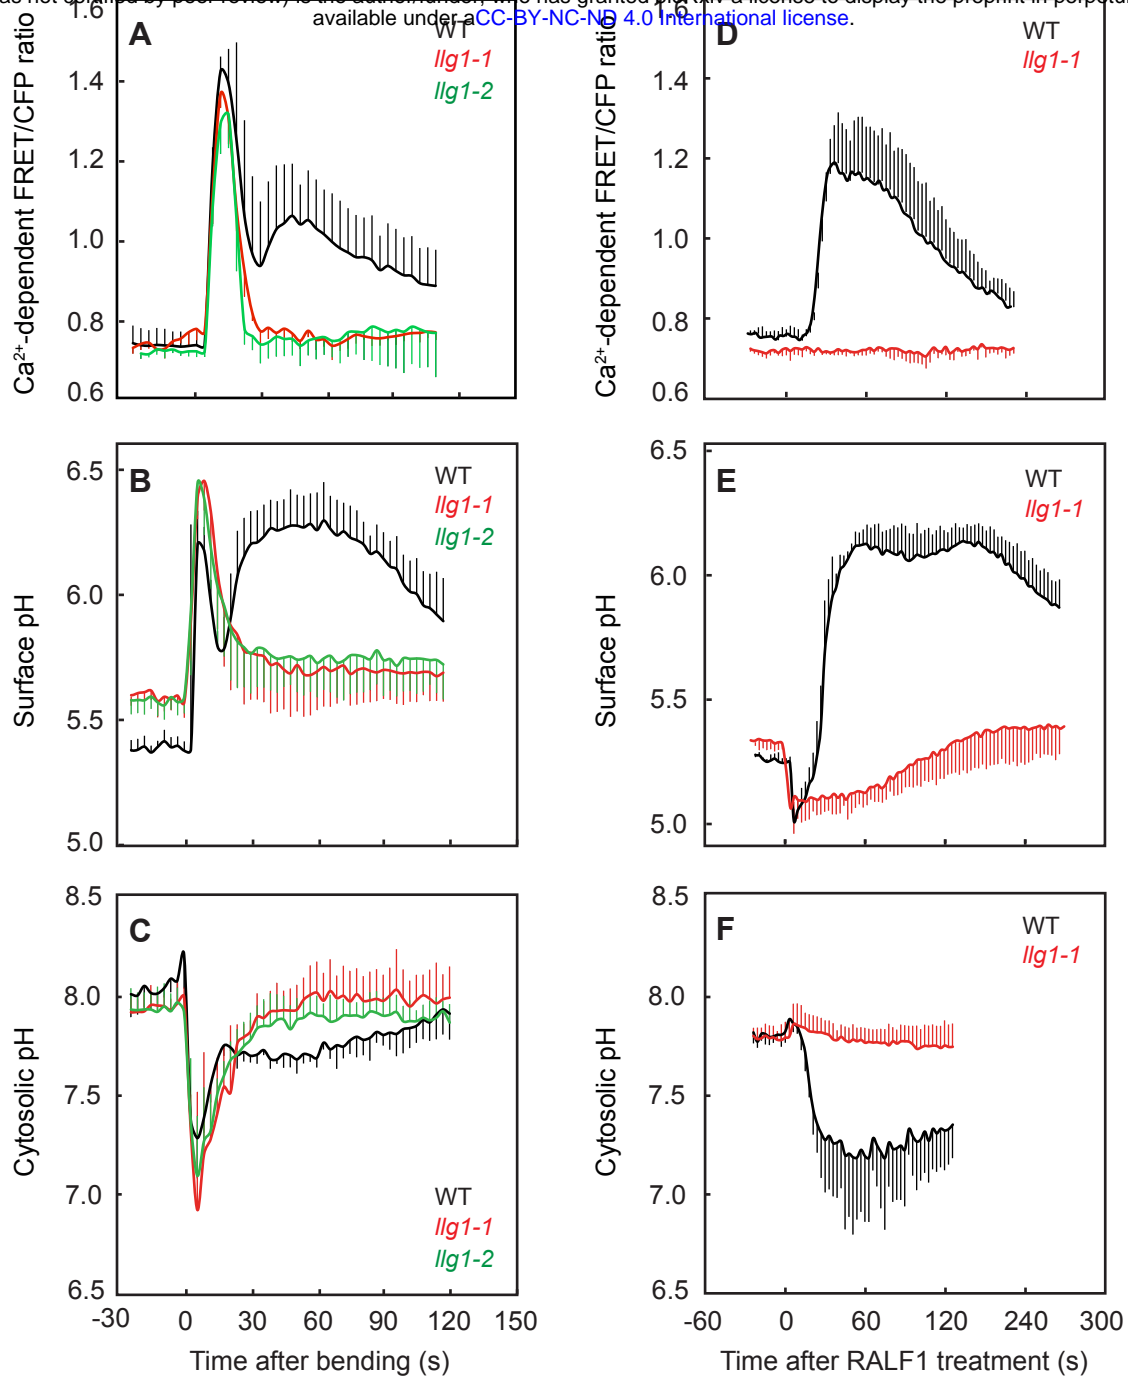

**Figure 4.** Arabidopsis *llg1* mutants exhibit *fer*-like ion signaling responses to root bending and RALF1. A-C, Effect of 1  $\mu$ M RALF1 on (A) cytosolic Ca<sup>2+</sup>, (B) surface pH, and (C) cytosolic pH in epidermal cells of WT and *llg1* root elongation zone. Means + or – SD of n = (A) 4 (WT) and 5 (*llg1-1*); (B) 6 (WT), 7 (*llg1-1*); (C) 4 (WT), 5 (*llg1-1*) roots. D-F, Effect of root bending on (D) cytosolic Ca<sup>2+</sup>, (E) surface pH, and (F) cytosolic pH in epidermal cells on the convex (stretched) side of WT and *llg1* root elongation zone. Means + or – SD of n = (D) 3 (WT), 4 (*llg1-1*) 5 (*llg1-2*); (E) 6 (WT, *llg1-1* and *llg1-2*); (F) 4 (WT, *llg1-1*, *llg1-2*) roots.

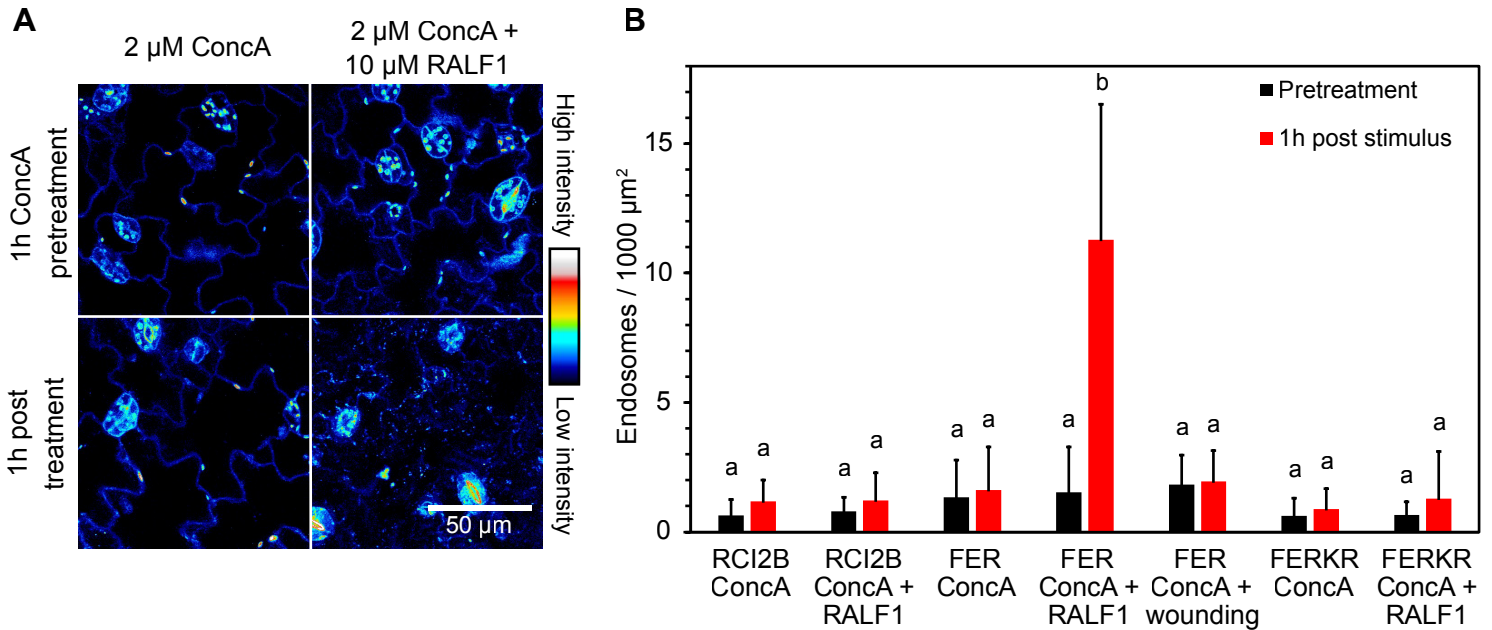

**Figure 5.** RALF1-induced loss of PM FER-eGFP is accompanied by appearance of FER-eGFP labeled endosomes in the presence of concanamycin A.

A, Effect of ConcA on subcellular localization of FER-eGFP in pavement cells of Arabidopsis

*pFER::FER-eGFP/fer-4* cotyledons. Seedlings were first pretreated with 2  $\mu\text{M}$  ConcA for 1 h and then incubated for 1 h with either 2  $\mu\text{M}$  ConcA (control; left panels) or 2  $\mu\text{M}$  ConcA + 10  $\mu\text{M}$  RALF1 (right panels). Note the appearance of fluorescent punctae after RALF1 treatment, reflecting FER-eGFP-labeled endosomes. Representative fluorescence images are shown.

B, Endosomal targeting is specific to RALF1-treatment and kinase-active FER-eGFP. Note that neither eGFP-RCI2B nor FERKR-eGFP appeared in endosomes after treatment with 2  $\mu\text{M}$  ConcA + 10  $\mu\text{M}$  RALF1. Mechanical wounding of cotyledons also triggered no detectable internalization of FER-eGFP. Endosomal density was quantified by segmentation analysis.

Means + SD of  $n = 5$  (RCI2B ConcA), 5 (RCI2B ConcA + RALF1), 8 (FER ConcA), 8 (FER ConcA + RALF1), 6 (FER ConcA + wounding), 5 (FERKR ConcA) and 5 (FERKR ConcA + RALF1) seedlings.

Black bars, number of endosomes after 1h ConcA pretreatment; red bars, number of endosomes after 1h treatment (only ConcA or ConcA + stimulus). Letters indicate statistically significant differences between each pretreatment and corresponding post treatment ( $p \leq 0.05$ ; two-tailed Welch's t-test).



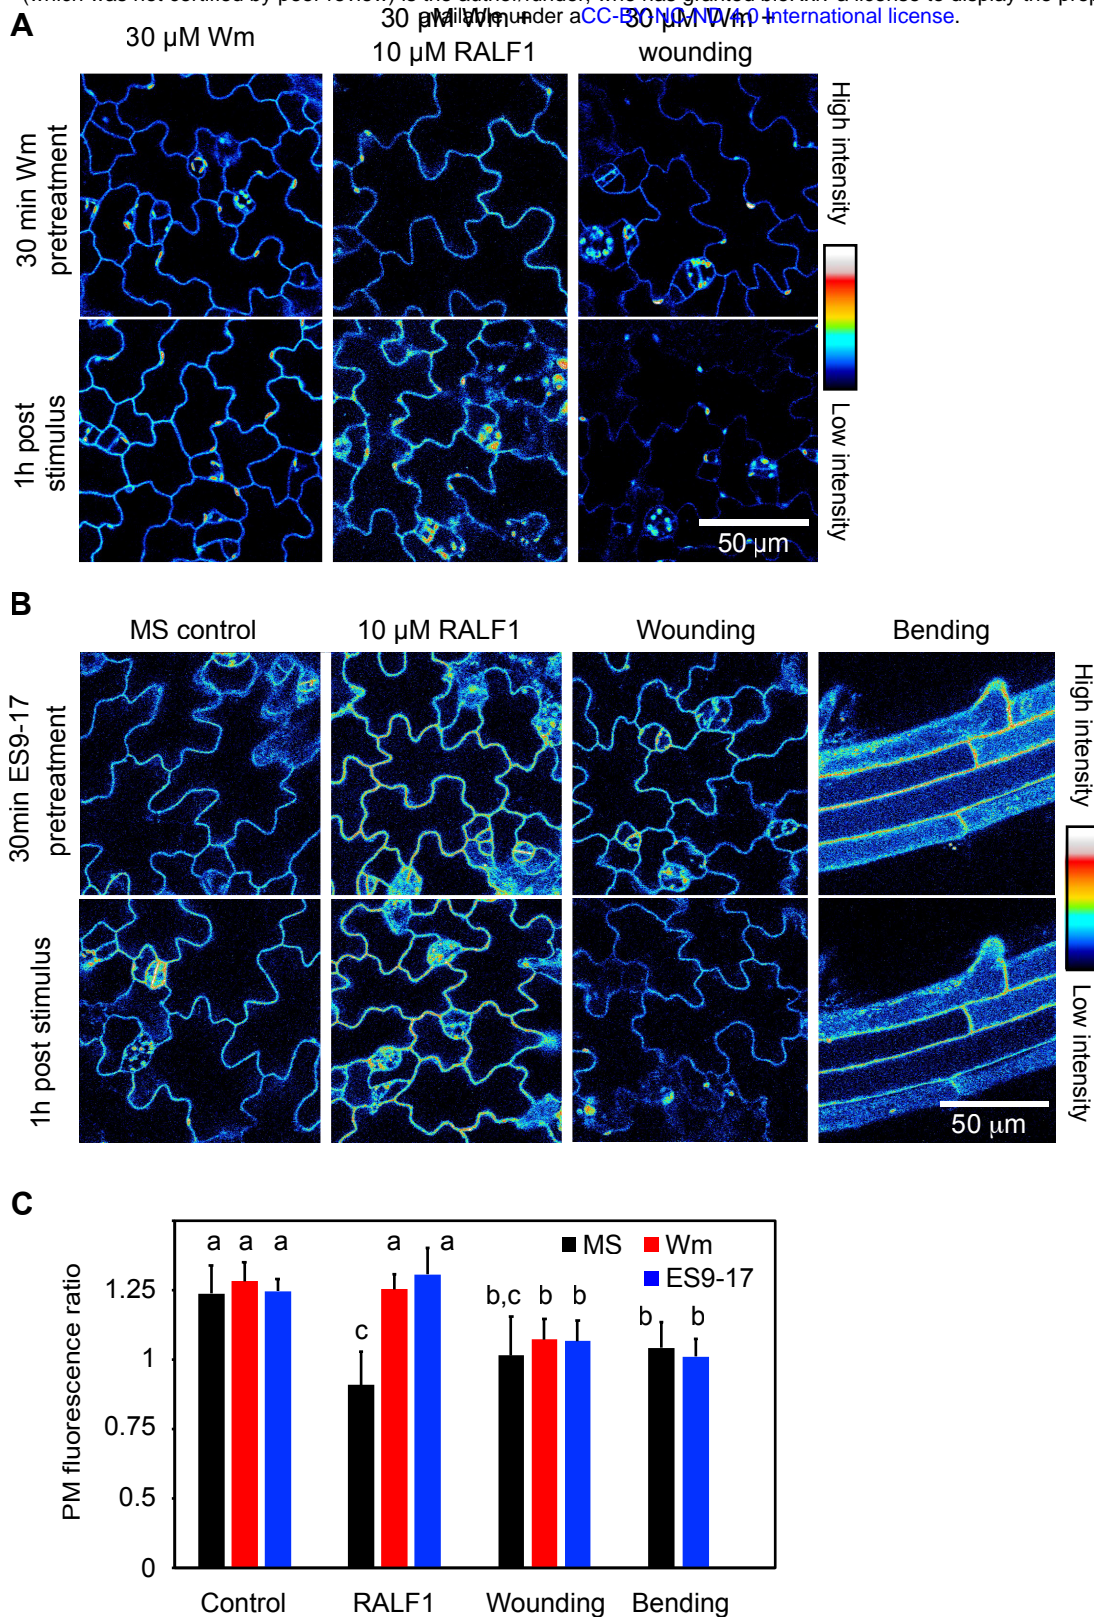

**Figure 6.** Differential effects of wortmannin and endosin 9-17 on RALF1- and mechanically-induced loss of FER-eGFP PM fluorescence. A, Effect of Wm on FER-eGFP PM abundance in pavement cells of Arabidopsis pFER::FER-eGFP/fer-4 cotyledons. Seedlings were pretreated with 30  $\mu$ M Wm for 30 min and then incubated for 1 h with either 30  $\mu$ M Wm (control; left panels) or 30  $\mu$ M Wm + 10  $\mu$ M RALF1 (middle panels), or subjected to wounding in the presence of 30  $\mu$ M Wm (right panels). Representative fluorescence images are shown. B, Effect of ES9-17 on FER-eGFP PM abundance in epidermal cells of Arabidopsis FERpro:FER-eGFP/fer-4 seedlings. Seedlings were pretreated with 30  $\mu$ M ES9-17 for 30 min and then incubated for 1 h with either 30  $\mu$ M ES9-17 (control) or 30  $\mu$ M ES9-17 + 10  $\mu$ M RALF1, or subjected to mechanical stimulation by cotyledon wounding or root bending in the presence of 30  $\mu$ M ES9-17. Representative fluorescence images are shown. C, Quantification of FER-eGFP PM fluorescence changes; ratios were calculated as PM fluorescence intensity 1 h after stimulation divided by fluorescence intensity before stimulation. Means + SD of n = 4 (Wm), 8 (Wm + RALF1), 8 (Wm + wounding), 5 (ES9-17), 6 (ES9-17 + RALF1), 4 (ES9-17 + wounding), 8 (ES9-17 + root bending) seedlings; data for FER-eGFP MS are taken from Fig. 1. Letters indicate statistically significant differences ( $p \leq 0.05$ ; two-tailed Welch's t-test).



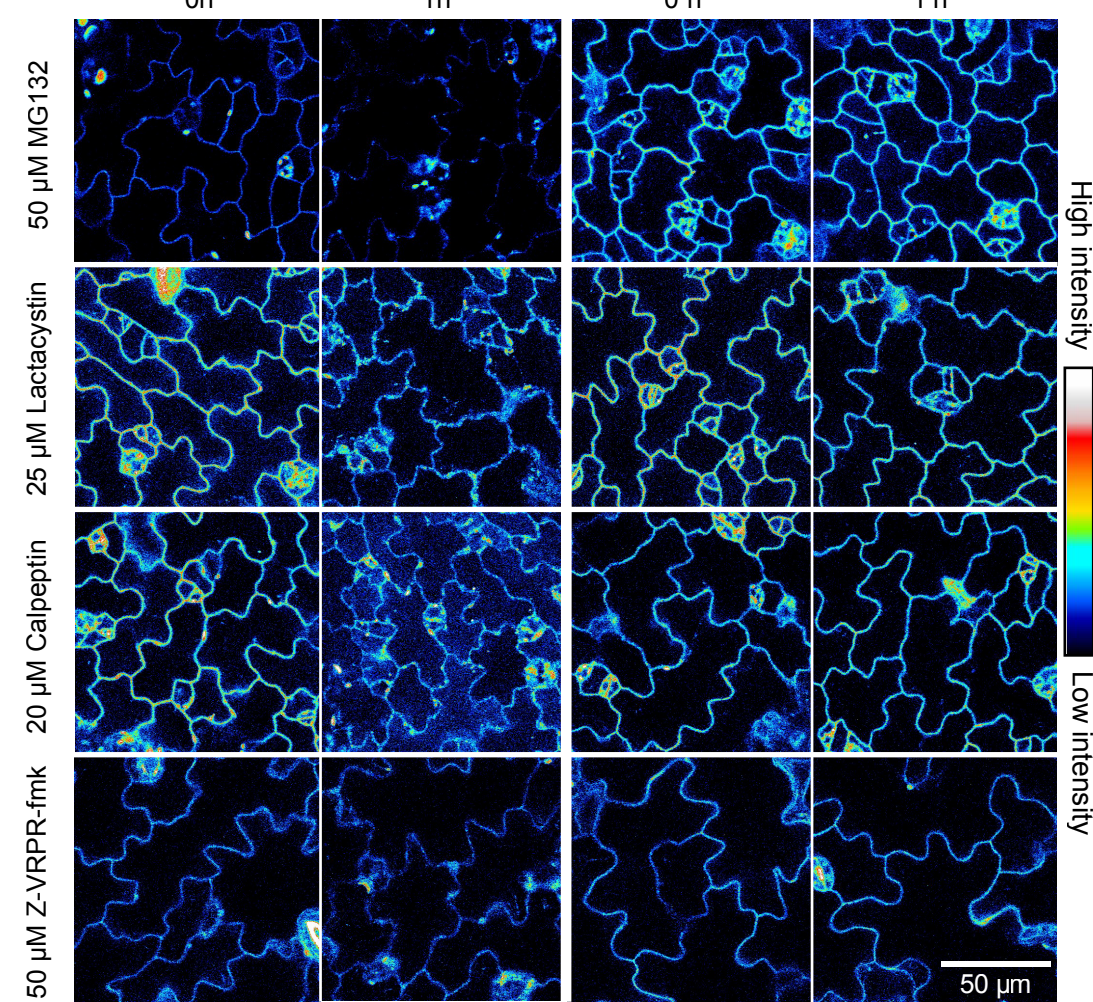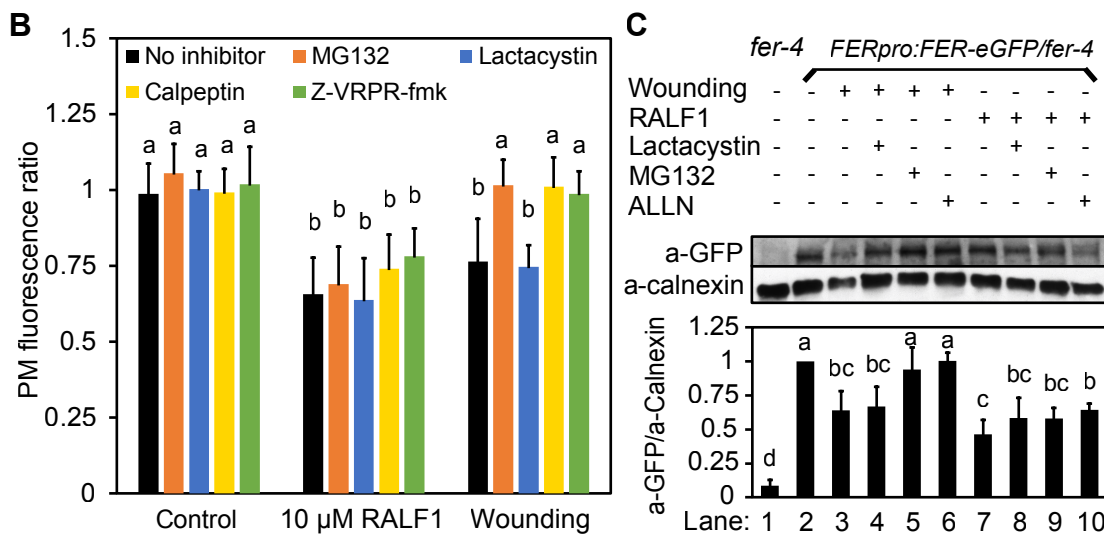

**Figure 7. Differential effects of protease inhibitors on RALF1- and wounding-induced FER-eGFP degradation.**

**A**, Effect of protease inhibitors on FER-eGFP PM abundance in pavement cells of Arabidopsis *FERpro:FER-eGFP/fer-4* cotyledons. Seedlings were pretreated for 30 min with either the 26S-proteasome inhibitor lactacystin, the general cysteine protease inhibitor MG132, the calpain inhibitor calpeptin or the metacaspase inhibitor Z-VRPR-fmk and then either incubated for 1 h with protease inhibitor + 10 μM RALF1 or subjected to wounding in the presence of the protease inhibitor. Representative fluorescence images before and after stimulation are shown. **B**, Quantification of FER-eGFP PM fluorescence changes; ratios were calculated as PM fluorescence intensity 1 h after stimulation divided by fluorescence intensity before stimulation. Means + SD for control: n = 5 (MG132), 4 (lactacystin), 4 (calpeptin), 5 (Z-VRPR-fmk); for RALF1 treatment: n = 10 (MG132), 4 (lactacystin), 4 (calpeptin), 5 (Z-VRPR-fmk); for wounding assay: n = 10 (MG132), 7 (lactacystin), 4 (calpeptin), 5 (Z-VRPR-fmk) seedlings; data for FER-eGFP ‘no inhibitor’ are taken from Figure 1. **C**, Immunoblot analysis of total protein extracted from Arabidopsis *FERpro:FER-eGFP/fer-4* seedling shoots 3 h after treatment by RALF1 exposure or wounding. The immunoblots were probed with antibodies against GFP and calnexin as indicated, with the latter used as a loading control. Blot quantification was performed by calculating the ratios of anti-GFP band density values by corresponding density values of anti-calnexin bands (see also Supplemental Figure S12). Note that pretreatment with the cysteine protease inhibitor MG132 and the calpain inhibitor ALLN inhibited wounding-induced, but not RALF1-induced FER-eGFP degradation. The shown immunoblot is representative of three biological replicates. Means + SD of n = 4 blots except for ALLN treatment (n=3); band density ratios were normalized to the untreated control (lane 2). Letters indicate statistically significant differences ( $p \leq 0.05$ ; two-tailed Welch's t-test).



## Parsed Citations

- Bassham, D.C., Laporte, M., Marty, F., Moriyasu, Y., Ohsumi, Y., Olsen, L.J., and Yoshimoto, K. (2006). Autophagy in Development and Stress Responses of Plants. *Autophagy* 2: 2–11.**  
Google Scholar: [Author Only](#) [Title Only](#) [Author and Title](#)
- Bastien, R., Legland, D., Martin, M., Fregosi, L., Peaucelle, A., Douady, S., Moulia, B., and Hiç<sup>1</sup>/<sub>2</sub>fte, H. (2016). KymoRod: a method for automated kinematic analysis of rod-shaped plant organs. *Plant Journal* 88: 468–475.**  
Google Scholar: [Author Only](#) [Title Only](#) [Author and Title](#)
- Ben Khaled, S. (2016). Post-translational events control pattern recognition receptor trafficking to preserve PAMP responsiveness in plant immunity. Doctoral thesis, University of East Anglia**  
Google Scholar: [Author Only](#) [Title Only](#) [Author and Title](#)
- Ben Khaled, S., Postma, J., and Robatzek, S. (2015). A Moving View: Subcellular Trafficking Processes in Pattern Recognition Receptor–Triggered Plant Immunity. *Annual Review of Phytopathology* 53: 379–402.**  
Google Scholar: [Author Only](#) [Title Only](#) [Author and Title](#)
- Bhat, A, Depew, C.L., and Monshausen, G.B. (2021). High-resolution kinematic analysis of root gravitropic bending using RootPlot. *Methods in Molecular Biology*, in press**  
Google Scholar: [Author Only](#) [Title Only](#) [Author and Title](#)
- Bradford, M.M. (1976). A Rapid and Sensitive Method for the Quantitation Microgram Quantities of Protein Utilizing the Principle of Protein-Dye Binding. *Analytical Biochemistry* 72: 248–254.**  
Google Scholar: [Author Only](#) [Title Only](#) [Author and Title](#)
- Chakravorty, D., Yu, Y., and Assmann, S.M. (2018). A kinase-dead version of FERONIA receptor-like kinase has dose-dependent impacts on rosette morphology and RALF1-mediated stomatal movements. *FEBS Letters* 592: 3429–3437.**  
Google Scholar: [Author Only](#) [Title Only](#) [Author and Title](#)
- Chen, J. et al. (2016). FERONIA interacts with ABI2-type phosphatases to facilitate signaling cross-talk between abscisic acid and RALF peptide in *Arabidopsis*. *Proceedings of the National Academy of Sciences* 113: E5519–E5527.**  
Google Scholar: [Author Only](#) [Title Only](#) [Author and Title](#)
- Cutler, S.R., Ehrhardt, D.W., Griffiths, J.S., and Somerville, C.R. (2000). Random GFP::cDNA fusions enable visualization of subcellular structures in cells of *Arabidopsis* at a high frequency. *PNAS* 97: 3718–3723.**  
Google Scholar: [Author Only](#) [Title Only](#) [Author and Title](#)
- Dejonghe, W. et al. (2019). Disruption of endocytosis through inhibition of clathrin heavy chain function. *Nature Chemical Biology* 15: 641–649.**  
Google Scholar: [Author Only](#) [Title Only](#) [Author and Title](#)
- Deslauriers, S.D. and Larsen, P.B. (2010). FERONIA is a key modulator of brassinosteroid and ethylene responsiveness in *Arabidopsis* hypocotyls. *Molecular Plant* 3: 626–640.**  
Google Scholar: [Author Only](#) [Title Only](#) [Author and Title](#)
- Dettmer, J., Hong-Hermesdorf, A., Stierhof, Y.-D., and Schumacher, K. (2006). Vacuolar H<sup>+</sup>-ATPase Activity Is Required for Endocytic and Secretory Trafficking in *Arabidopsis*. *The Plant Cell* 18: 715–730.**  
Google Scholar: [Author Only](#) [Title Only](#) [Author and Title](#)
- Dong, Q., Zhang, Z., Liu, Y., Tao, L.-Z., and Liu, H. (2019). FERONIA regulates auxin-mediated lateral root development and primary root gravitropism. *FEBS Letters* 593: 97–106.**  
Google Scholar: [Author Only](#) [Title Only](#) [Author and Title](#)
- Duan, Q., Kita, D., Li, C., Cheung, A.Y., and Wu, H.-M. (2010). FERONIA receptor-like kinase regulates RHO GTPase signaling of root hair development. *Proceedings of the National Academy of Sciences of the United States of America* 107: 17821–17826.**  
Google Scholar: [Author Only](#) [Title Only](#) [Author and Title](#)
- Dünser, K., Gupta, S., Kleine-vehn, J., Herger, A., Feraru, M.I., Ringli, C., and Kleine-Vehn, J. (2019). Extracellular matrix sensing by FERONIA and Leucine-Rich Repeat Extensins controls vacuolar expansion during cellular elongation in *Arabidopsis thaliana*. *The EMBO Journal* 38: e100353.**  
Google Scholar: [Author Only](#) [Title Only](#) [Author and Title](#)
- Earley, K.W., Haag, J.R., Pontes, O., Opper, K., Juehne, T., Song, K., and Pikaard, C.S. (2006). Gateway-compatible vectors for plant functional genomics and proteomics. *The Plant Journal* 45: 616–629.**  
Google Scholar: [Author Only](#) [Title Only](#) [Author and Title](#)
- Emans, N., Zimmermann, S., and Fischer, R. (2002). Uptake of a Fluorescent Marker in Plant Cells Is Sensitive to Brefeldin A and Wortmannin. *The Plant Cell* 14: 71–86.**  
Google Scholar: [Author Only](#) [Title Only](#) [Author and Title](#)
- Erwig, J., Ghareeb, H., Kopischke, M., Hacke, R., Matei, A., Petutschnig, E., and Lipka, V. (2017). Chitin-induced and CHITIN ELICITOR RECEPTOR KINASE1 (CERK1) phosphorylation-dependent endocytosis of *Arabidopsis thaliana* LYSIN MOTIF-CONTAINING**

**RECEPTOR-LIKE KINASE5 (LYK5). *New Phytologist* 215: 382–396.**

Google Scholar: [Author Only](#) [Title Only](#) [Author and Title](#)

**Escobar-Restrepo, J.M., Huck, N., Kessler, S., Gagliardini, V., Gheyselinck, J., Yang, W.-C., and Grossniklaus, U. (2007). The FERONIA receptor-like kinase mediates male-female interactions during pollen tube reception. *Science* 317: 656–660.**

Google Scholar: [Author Only](#) [Title Only](#) [Author and Title](#)

**Feng, W. et al. (2018). The FERONIA Receptor Kinase Maintains Cell-Wall Integrity during Salt Stress through Ca<sup>2+</sup> Signaling. *Current Biology* 28: 666–675.e5.**

Google Scholar: [Author Only](#) [Title Only](#) [Author and Title](#)

**Fenteany, G., Standaert, R.F., Lane, W.S., Choi, S., Corey, E.J., and Schreiber, S.L. (1995). Inhibition of Proteasome Activities and Subunit-Specific Amino-Terminal Threonine Modification by Lactacystin. *Science* 268: 726–731.**

Google Scholar: [Author Only](#) [Title Only](#) [Author and Title](#)

**Fernandes, M., Duplaquet, L., and Tulasne, D. (2019). Proteolytic cleavages of MET: the divide-and-conquer strategy of a receptor tyrosine kinase. *BMB Reports* 52: 239–249.**

Google Scholar: [Author Only](#) [Title Only](#) [Author and Title](#)

**Galindo-Trigo, S., Blanco-Touriñán, N., Defalco, T.A., Wells, E.S., Gray, J.E., Zipfel, C., and Smith, L.M. (2020). CrRLK1L receptor-like kinases HERK 1 and ANJEA are female determinants of pollen tube reception. *EMBO reports* 21: e48466.**

Google Scholar: [Author Only](#) [Title Only](#) [Author and Title](#)

**Gjetting, S.K., Mahmood, K., Shabala, L., Kristensen, A., Shabala, S., Palmgren, M., and Fuglsang, A.T. (2020). Evidence for multiple receptors mediating RALF-triggered Ca<sup>2+</sup> signaling and proton pump inhibition. *The Plant Journal* 104: 433–446.**

Google Scholar: [Author Only](#) [Title Only](#) [Author and Title](#)

**Gronnier, J., Franck, C.M., Stegmann, M., Defalco, T.A., Cifuentes, A.A., Dünser, K., Lin, W., Yang, Z., Kleine-Vehn, J., Ringli, C., and Zipfel, C. (2020). FERONIA regulates FLS2 plasma membrane nanoscale dynamics to modulate plant immune signaling. *bioRxiv*: 1–35.**

Google Scholar: [Author Only](#) [Title Only](#) [Author and Title](#)

**Guo, H., Nolan, T.M., Song, G., Liu, S., Xie, Z., Chen, J., Schnable, P.S., Walley, J.W., and Yin, Y. (2018). FERONIA Receptor Kinase Contributes to Plant Immunity by Suppressing Jasmonic Acid Signaling in *Arabidopsis thaliana*. *Current Biology* 28: 3316–3324.**

Google Scholar: [Author Only](#) [Title Only](#) [Author and Title](#)

**Hander, T. et al. (2019). Damage on plants activates Ca<sup>2+</sup>-dependent metacaspases for release of immunomodulatory peptides. *Science* 363: eaar7486.**

Google Scholar: [Author Only](#) [Title Only](#) [Author and Title](#)

**Haruta, M., Gaddameedi, V., Burch, H., Fernandez, D., and Sussman, M.R. (2018). Comparison of the effects of a kinase-dead mutation of FERONIA on ovule fertilization and root growth of *Arabidopsis*. *FEBS Letters* 592: 2395–2402.**

Google Scholar: [Author Only](#) [Title Only](#) [Author and Title](#)

**Haruta, M., Monshausen, G.B., Gilroy, S., and Sussman, M.R. (2008). A cytoplasmic Ca<sup>2+</sup>-functional assay for identifying and purifying endogenous cell signaling peptides in *Arabidopsis* seedlings: Identification of AtRALF1 peptide. *Biochemistry* 47: 6311–6321.**

Google Scholar: [Author Only](#) [Title Only](#) [Author and Title](#)

**Haruta, M., Sabat, G., Stecker, K., Minkoff, B.B., and Sussman, M.R. (2014). A Peptide Hormone and Its Receptor Protein Kinase Regulate Plant Cell Expansion. *Science* 343: 408–411.**

Google Scholar: [Author Only](#) [Title Only](#) [Author and Title](#)

**Herger, A., Gupta, S., Kadler, G., Franck, C.M., Boisson-Dernier, A., and Ringli, C. (2019). LRR-extensins of vegetative tissues are a functionally conserved family of RALF1 receptors interacting with the receptor kinase FERONIA *bioRxiv*: 1–36.**

Google Scholar: [Author Only](#) [Title Only](#) [Author and Title](#)

**Höfte, H. (2015). The Yin and Yang of Cell Wall Integrity Control: Brassinosteroid and FERONIA Signaling. *Plant and Cell Physiology* 56: 224–231.**

Google Scholar: [Author Only](#) [Title Only](#) [Author and Title](#)

**Huang, H. (2021). Proteolytic Cleavage of Receptor Tyrosine Kinases. *Biomolecules* 11: 660.**

Google Scholar: [Author Only](#) [Title Only](#) [Author and Title](#)

**Huck, N., Moore, J.M., Federer, M., and Grossniklaus, U. (2003). The *Arabidopsis* mutant *feronia* disrupts the female gametophytic control of pollen tube reception. *Development* 130: 2149–2159.**

Google Scholar: [Author Only](#) [Title Only](#) [Author and Title](#)

**Huss, M., Ingenhorst, G., König, S., Gaßel, M., Dröse, S., Zeeck, A., Altendorf, K., and Weczorek, H. (2002). Concanamycin A, the specific inhibitor of V-ATPases, binds to the VO subunit c. *Journal of Biological Chemistry* 277: 40544–40548.**

Google Scholar: [Author Only](#) [Title Only](#) [Author and Title](#)

**Kliwer, A., Reinscheid, R.K., and Schulz, S. (2017). Emerging Paradigms of G Protein-Coupled Receptor Dephosphorylation. *Trends in Pharmacological Sciences* 38: 621–636.**

Google Scholar: [Author Only](#) [Title Only](#) [Author and Title](#)

**Krol, E., Mentzel, T., Chinchilla, D., Boller, T., Felix, G., Kemmerling, B., Postel, S., Arents, M., Jeworutzki, E., Al-Rasheid, K.A.S., Becker, D., and Hedrich, R. (2010). Perception of the Arabidopsis danger signal peptide 1 involves the pattern recognition receptor AtPEPR1 and its close homologue AtPEPR2. *Journal of Biological Chemistry* 285: 13471–13479.**

Google Scholar: [Author Only](#) [Title Only](#) [Author and Title](#)

**Latorraca, N.R., Masureel, M., Hollingsworth, S.A., Heydenreich, F.M., Suomivuori, C.-M., Brinton, C., Townshend, R.J.L., Bouvier, M., Kobilka, B.K., and Dror, R.O. (2020). How GPCR Phosphorylation Patterns Orchestrate Arrestin-Mediated Signaling. *Cell* 183: 1813–1825.**

Google Scholar: [Author Only](#) [Title Only](#) [Author and Title](#)

**Ledda, F. and Paratcha, G. (2007). Negative Regulation of Receptor Tyrosine Kinase (RTK) Signaling: A Developing Field. *Biomarker Insights* 2: 45–58.**

Google Scholar: [Author Only](#) [Title Only](#) [Author and Title](#)

**Lee, D.H. and Goldberg, A.L. (1998). Proteasome inhibitors: valuable new tools for cell biologists. *Trends in Cell Biology* 8: 397–403.**

Google Scholar: [Author Only](#) [Title Only](#) [Author and Title](#)

**Lemmon, M.A., Freed, D.M., Schlessinger, J., and Kiyatkin, A. (2016). The Dark Side of Cell Signaling: Positive Roles for Negative Regulators. *Cell* 164: 1172–1184.**

Google Scholar: [Author Only](#) [Title Only](#) [Author and Title](#)

**Leslie, M.E. and Heese, A. (2017). Quantitative Analysis of Ligand-Induced Endocytosis of FLAGELLIN-SENSING 2 Using Automated Image Segmentation. In *Plant Pattern Recognition Receptors: Methods and Protocols*, L. Shan and P. He, eds (Springer Science+Business Media LLC), pp. 39–54.**

Google Scholar: [Author Only](#) [Title Only](#) [Author and Title](#)

**Li, B., Lu, D., and Shan, L. (2014a). Ubiquitination of pattern recognition receptors in plant innate immunity. *Molecular Plant Pathology* 15: 737–746.**

Google Scholar: [Author Only](#) [Title Only](#) [Author and Title](#)

**Li, C. et al. (2015). Glycosylphosphatidylinositol-anchored proteins as chaperones and co-receptors for FERONIA receptor kinase signaling in Arabidopsis. *eLife* 4: 1–21.**

Google Scholar: [Author Only](#) [Title Only](#) [Author and Title](#)

**Li, S., Sun, P., Williams, J.S., and Kao, T. (2014b). Identification of the self-incompatibility locus F-box protein-containing complex in *Petunia inflata*. *Plant Reproduction* 27: 31–45.**

Google Scholar: [Author Only](#) [Title Only](#) [Author and Title](#)

**Li, X., Wang, X., Yang, Y., Li, R., He, Q., Fang, X., Luu, D.-T., Maurel, C., and Lin, J. (2011). Single-Molecule Analysis of PIP<sub>2</sub>:1 Dynamics and Partitioning Reveals Multiple Modes of Arabidopsis Plasma Membrane Aquaporin Regulation. *The Plant Cell* 23: 3780–3797.**

Google Scholar: [Author Only](#) [Title Only](#) [Author and Title](#)

**Liao, D., Cao, Y., Sun, X., Espinoza, C., Nguyen, C.T., Liang, Y., and Stacey, G. (2017). Arabidopsis E3 ubiquitin ligase PLANT U-BOX13 (PUB13) regulates chitin receptor LYSIN MOTIF RECEPTOR KINASE5 (LYK5) protein abundance. *New Phytologist* 214: 1646–1656.**

Google Scholar: [Author Only](#) [Title Only](#) [Author and Title](#)

**Lid, S.E., Gruis, D., Jung, R., Lorentzen, J.A., Ananiev, E., Chamberlin, M., Niu, X., Meeley, R., Nichols, S., and Olsen, O.-A. (2002). The defective kernel 1 (*dek1*) gene required for aleurone cell development in the endosperm of maize grains encodes a membrane protein of the calpain gene superfamily. *PNAS* 99: 5460–5465.**

Google Scholar: [Author Only](#) [Title Only](#) [Author and Title](#)

**Lu, D., Lin, W., Gao, X., Wu, S., Cheng, C., Avila, J., Heese, A., Devarenne, T.P., He, P., and Shan, L. (2011). Direct Ubiquitination of Pattern Recognition Receptor FLS2 Attenuates Plant Innate Immunity. *Science* 332: 1439–1442.**

Google Scholar: [Author Only](#) [Title Only](#) [Author and Title](#)

**Macho, A.P. et al. (2014). A Bacterial Tyrosine Phosphatase Inhibits Plant Pattern Recognition Receptor Activation. *Science* 343: 1509–1513.**

Google Scholar: [Author Only](#) [Title Only](#) [Author and Title](#)

**Masachis, S., Segorbe, D., Turrà, D., Leon-ruiz, M., Fürst, U., Ghalid, M. El, Leonard, G., López-berges, M.S., Richards, T.A., Felix, G., and Pietro, A. Di (2016). A fungal pathogen secretes plant alkalinizing peptides to increase infection. *Nature Microbiology* 1: 16043.**

Google Scholar: [Author Only](#) [Title Only](#) [Author and Title](#)

**Mbengue, M., Bourdais, G., Gervasi, F., Beck, M., Zhou, J., Spallek, T., Bartels, S., Boller, T., Ueda, T., Kuhn, H., and Robatzek, S. (2016). Clathrin-dependent endocytosis is required for immunity mediated by pattern recognition receptor kinases. *Proceedings of the National Academy of Sciences* 113: 11034–11039.**

Google Scholar: [Author Only](#) [Title Only](#) [Author and Title](#)

**Ménard, L., Parker, P.J., and Kermorgant, S. (2014). Receptor tyrosine kinase c-Met controls the cytoskeleton from different endosomes via different pathways. *Nature Communications* 5: 1–14.**

Google Scholar: [Author Only](#) [Title Only](#) [Author and Title](#)

**Monshausen, G.B., Bibikova, T.N., Messerli, M.A., Shi, C., and Gilroy, S. (2007). Oscillations in extracellular pH and reactive oxygen**

**species modulate tip growth of Arabidopsis root hairs. Proceedings of the National Academy of Sciences of the United States of America 104: 20996–21001.**

Google Scholar: [Author Only Title Only Author and Title](#)

**Monshausen, G.B., Bibikova, T.N., Weisenseel, M.H., and Gilroy, S. (2009). Ca<sup>2+</sup> Regulates Reactive Oxygen Species Production and pH during Mechanosensing in Arabidopsis Roots. The Plant Cell 21: 2341–2356.**

Google Scholar: [Author Only Title Only Author and Title](#)

**Monshausen, G.B., Miller, N.D., Murphy, A.S., and Gilroy, S. (2011). Dynamics of auxin-dependent Ca<sup>2+</sup> and pH signaling in root growth revealed by integrating high-resolution imaging with automated computer vision-based analysis. Plant Journal 65: 309–318.**

Google Scholar: [Author Only Title Only Author and Title](#)

**Nagai, T., Yamada, S., Tominaga, T., Ichikawa, M., and Miyawaki, A. (2004). Expanded dynamic range of fluorescent indicators for Ca<sup>2+</sup> by circularly permuted yellow fluorescent proteins. Proceedings of the National Academy of Sciences 101: 10554–10559.**

Google Scholar: [Author Only Title Only Author and Title](#)

**Nühse, T.S., Stensballe, A., Jensen, O.N., and Peck, S.C. (2004). Phosphoproteomics of the Arabidopsis Plasma Membrane and a New Phosphorylation Site Database. The Plant Cell 16: 2394–2405.**

Google Scholar: [Author Only Title Only Author and Title](#)

**Ono, Y., Saido, T.C., and Sorimachi, H. (2016). Calpain research for drug discovery: challenges and potential. Nature Reviews 15: 854–876.**

Google Scholar: [Author Only Title Only Author and Title](#)

**Paez Valencia, J., Goodman, K., and Otegui, M.S. (2016). Endocytosis and Endosomal Trafficking in Plants. Annual Review of Plant Biology 67: 309–335.**

Google Scholar: [Author Only Title Only Author and Title](#)

**Perraki, A. et al. (2018). Phosphocode-dependent functional dichotomy of a common co-receptor in plant signaling. Nature 561: 248–252.**

Google Scholar: [Author Only Title Only Author and Title](#)

**Petutschnig, E.K. et al. (2014). A novel Arabidopsis CHITIN ELICITOR RECEPTOR KINASE 1 (CERK1) mutant with enhanced pathogen-induced cell death and altered receptor processing. New Phytologist 204: 955–967.**

Google Scholar: [Author Only Title Only Author and Title](#)

**Robatzek, S., Chinchilla, D., and Boller, T. (2006). Ligand-induced endocytosis of the pattern recognition receptor FLS2 in Arabidopsis. Genes and Development 20: 537–542.**

Google Scholar: [Author Only Title Only Author and Title](#)

**Rotman, N., Rozier, F., Boavida, L., Dumas, C., Berger, F., and Faure, J.E. (2003). Female control of male gamete delivery during fertilization in Arabidopsis thaliana. Current Biology 13: 432–436.**

Google Scholar: [Author Only Title Only Author and Title](#)

**Salamon, S. and Robatzek, S. (2006). Induced Endocytosis of the Receptor Kinase FLS2. Plant Signaling & Behavior 1: 293–295.**

Google Scholar: [Author Only Title Only Author and Title](#)

**Schwessinger, B., Roux, M., Kadota, Y., Ntoukakis, V., Sklenar, J., Jones, A., and Zipfel, C. (2011). Phosphorylation-Dependent Differential Regulation of Plant Growth, Cell Death, and Innate Immunity by the Regulatory Receptor-Like Kinase BAK1. PLoS Genetics 7: e1002046.**

Google Scholar: [Author Only Title Only Author and Title](#)

**Shen, Q., Bourdais, G., Pan, H., Robatzek, S., and Tang, D. (2017). Arabidopsis glycosylphosphatidylinositol-anchored protein LLG1 associates with and modulates FLS2 to regulate innate immunity. Proceedings of the National Academy of Sciences 114: 5749–5754.**

Google Scholar: [Author Only Title Only Author and Title](#)

**Shen, W., Liu, J., and Li, J.-F. (2019). Type-II Metacaspases Mediate the Processing of Plant Elicitor Peptides in Arabidopsis. Molecular Plant 12: 1524–1533.**

Google Scholar: [Author Only Title Only Author and Title](#)

**Shih, H.-W., Miller, N.D., Dai, C., Spalding, E.P., and Monshausen, G.B. (2014). The Receptor-like Kinase FERONIA Is Required for Mechanical Signal Transduction in Arabidopsis Seedlings. Current Biology 24: 1887–1892.**

Google Scholar: [Author Only Title Only Author and Title](#)

**Stegmann, M., Monaghan, J., Smakowska-luzan, E., Rovenich, H., Lehner, A., Holton, N., Belkhadir, Y., and Zipfel, C. (2017). The receptor kinase FER is a RALF-regulated scaffold controlling plant immune signalling. Science 355: 287–289.**

Google Scholar: [Author Only Title Only Author and Title](#)

**Takagi, J. and Uemura, T. (2018). Use of Brefeldin A and Wortmannin to Dissect Post-Golgi Organelles Related to Vacuolar Transport in Arabidopsis thaliana. In Plant Vacuolar Trafficking, C. Pereira, ed (Humana Press), pp. 155–165.**

Google Scholar: [Author Only Title Only Author and Title](#)

**Thynne, E. et al. (2017). Fungal phytopathogens encode functional homologues of plant rapid alkalization factor (RALF) peptides. Molecular Plant Pathology 18: 811–824.**



Google Scholar: [Author Only](#) [Title Only](#) [Author and Title](#)

**Toyota, M., Spencer, D., Sawai-Toyota, S., Jiaqi, W., Zhang, T., Koo, A.J., Howe, G.A., and Gilroy, S. (2018). Glutamate triggers long-distance calcium-based plant defense signaling. *Science* 361: 1112–1115.**

Google Scholar: [Author Only](#) [Title Only](#) [Author and Title](#)

**Tran, D., Galletti, R., Neumann, E.D., Dubois, A., Sharif-Naeini, R., Geitmann, A., Frachisse, J.-M., Hamant, O., and Ingram, G.C. (2017). A mechanosensitive Ca<sup>2+</sup> channel activity is dependent on the developmental regulator DEK1. *Nature Communications* 8: 1009.**

Google Scholar: [Author Only](#) [Title Only](#) [Author and Title](#)

**Tsubuki, S., Saito, Y., Tomioka, M., Ito, H., and Kawashima, S. (1996). Differential Inhibition of Calpain and Proteasome Activities by Peptidyl Aldehydes of Di-Leucine and Tri-Leucine. *Journal of Biochemistry* 119: 572–576.**

Google Scholar: [Author Only](#) [Title Only](#) [Author and Title](#)

**Wan, W.-L., Fröhlich, K., Pruitt, R.N., Nürnberger, T., and Zhang, L. (2019). Plant cell surface immune receptor complex signaling. *Current Opinion in Plant Biology* 50: 18–28.**

Google Scholar: [Author Only](#) [Title Only](#) [Author and Title](#)

**Wang, C., Barry, J.K., Min, Z., Tordsen, G., Rao, A.G., and Olsen, O.-A. (2003). The Calpain Domain of the Maize DEK1 Protein Contains the Conserved Catalytic Triad and Functions as a Cysteine Proteinase. *The Journal of Biological Chemistry* 278: 34467–34474.**

Google Scholar: [Author Only](#) [Title Only](#) [Author and Title](#)

**Xiao, Y., Stegmann, M., Han, Z., Defalco, T.A., Parys, K., Xu, L., Belkhadir, Y., Zipfel, C., and Chai, J. (2019). Mechanisms of RALF peptide perception by a heterotypic receptor complex. *Nature* 572: 270–274.**

Google Scholar: [Author Only](#) [Title Only](#) [Author and Title](#)

**Yang, F., Kimberlin, A.N., Elowsky, C.G., Liu, Y., Gonzalez-Solis, A., Cahoon, E.B., and Alfano, J.R. (2019). A Plant Immune Receptor Degraded by Selective Autophagy. *Molecular Plant* 12: 113–123.**

Google Scholar: [Author Only](#) [Title Only](#) [Author and Title](#)

**Yin, J., Yi, H., Chen, X., and Wang, J. (2019). Post-Translational Modifications of Proteins Have Versatile Roles in Regulating Plant Immune Responses. *International Journal of Molecular Sciences* 20: 2807.**

Google Scholar: [Author Only](#) [Title Only](#) [Author and Title](#)

**Yu, F. et al. (2012). FERONIA receptor kinase pathway suppresses abscisic acid signaling in Arabidopsis by activating ABI2 phosphatase. *Proceedings of the National Academy of Sciences* 109: 14693–14698.**

Google Scholar: [Author Only](#) [Title Only](#) [Author and Title](#)

**Yu, M. et al. (2020). The RALF1-FERONIA interaction modulates endocytosis to mediate control of root growth in Arabidopsis. *Development* 147: dev189902.**

Google Scholar: [Author Only](#) [Title Only](#) [Author and Title](#)

**Yu, Y. and Assmann, S.M. (2018). Inter-relationships between the heterotrimeric G $\beta$  subunit AGB1, the receptor-like kinase FERONIA, and RALF1 in salinity response. *Plant, Cell & Environment* 41: 2475–2489.**

Google Scholar: [Author Only](#) [Title Only](#) [Author and Title](#)

**Zhang, X. et al. (2020). Nematode-Encoded RALF Peptide Mimics Facilitate Parasitism of Plants through the FERONIA Receptor Kinase. *Molecular Plant* 13: 1434–1454.**

Google Scholar: [Author Only](#) [Title Only](#) [Author and Title](#)

**Zhao, C., Zayed, O., Yu, Z., Jiang, W., Zhu, P., Hsu, C., Zhang, L., Tao, W.A., Lozano-Durán, R., and Zhu, J.-K. (2018). Leucine-rich repeat extensin proteins regulate plant salt tolerance in Arabidopsis. *PNAS* 115: 13123–13128.**

Google Scholar: [Author Only](#) [Title Only](#) [Author and Title](#)

**Zhou, J., Wang, P., Claus, L.A.N., Savatin, D. V, Xu, G., Wu, S., Meng, X., Russinova, E., He, P., and Shan, L. (2019). Proteolytic Processing of SERK3/BAK1 Regulates Plant Immunity, Development, and Cell Death. *Plant Physiology* 180: 543–558.**

Google Scholar: [Author Only](#) [Title Only](#) [Author and Title](#)

**Zipfel, C., Kunze, G., Chinchilla, D., Caniard, A., Jones, J.D.G., Boller, T., and Felix, G. (2006). Perception of the Bacterial PAMP EF-Tu by the Receptor EFR Restricts Agrobacterium-Mediated Transformation. *Cell* 125: 749–760.**

Google Scholar: [Author Only](#) [Title Only](#) [Author and Title](#)

**Zwiewka, M., Nodzyński, T., Robert, S., Vanneste, S., and Friml, J. (2015). Osmotic Stress Modulates the Balance between Exocytosis and Clathrin-Mediated Endocytosis in Arabidopsis thaliana. *Molecular Plant* 8: 1175–1187.**

Google Scholar: [Author Only](#) [Title Only](#) [Author and Title](#)
